# Supplementary material for: Use of unprotected amino acids in metal-free tandem radical cyclization reactions: divergent synthesis of 6-alkyl/acyl phenanthridines
Source: Royal Society of Chemistry journal article supplement (doi:10.1039/c7ra12318c), 2017-01-01

## Supporting Information

### Use of Unprotected Amino Acids in Metal-Free Tandem Radical Cyclization Reactions: Divergent Synthesis of 6-Alkyl/Acyl

#### Phenanthridines

Shi-Chao Lu,<sup>a</sup> Hong-Shuang Li,<sup>\*b</sup> Ya-Ling Gong,<sup>a</sup> Xiao-Lei Wang,<sup>a</sup> Fu-Rong Li,<sup>b</sup> Fei Li,<sup>b</sup> Gui-Yun Duan<sup>b</sup> and Shu Xu<sup>\*a</sup>

<sup>a</sup>State Key Laboratory of Bioactive Substance and Function of Natural Medicines, and Beijing Key Laboratory of Active Substance Discovery and Drugability Evaluation, Institute of Materia Medica, Peking Union Medical College and Chinese Academy of Medical Sciences, No. 1 Xiannongtan Street, Beijing 100050, P R China;  
Fax: (+86)-(0)10-6316-5243; phone: (+86)-(0)10-6316-5243; e-mail: [xushu@imm.ac.cn](mailto:xushu@imm.ac.cn).

<sup>b</sup>School of Pharmaceutical Sciences, Taishan Medical University, 619 Changcheng Road, Taian 271016, P R China;  
Fax: (+86)-(0)538-6229-839; phone: (+86)-(0)538-6229-755; e-mail: [lihongshuang8625@163.com](mailto:lihongshuang8625@163.com).

|                                                                    |     |
|--------------------------------------------------------------------|-----|
| 1. General Considerations.....                                     | S2  |
| 2. Experimental procedures.....                                    | S3  |
| 3. Spectroscopic data.....                                         | S5  |
| 4. References.....                                                 | S17 |
| 5. Copies of <sup>1</sup> HNMR and <sup>13</sup> CNMR spectra..... | S18 |

## 1. General Considerations

Analytical and preparative thin layer chromatography (TLC) plates were purchased from Yantai Jiangyou Silica Gel Development Co., Ltd. The silica gel (200-300 mesh) for column chromatography was purchased from Qingdao Haiyang Chemical and Special Silica Gel Co, Ltd. The liquid chromatograph-mass spectrometer (LC-MS) analysis was performed on a Thermo Finnigan LCQ Advantage mass spectrometer equipped with an Agilent HPLC system and an eluent splitter (5% eluent was split into the MS system). High-resolution MS (HR MS) was analyzed by a TOF analyzer. The ion source was electrospray ionization (ESI). Both proton nuclear magnetic resonance ( $^1\text{H-NMR}$ ) spectra and carbon nuclear magnetic resonance ( $^{13}\text{C-NMR}$ ) spectra were recorded on Bruker 400 MHz spectrometer, using  $\text{CDCl}_3$  or  $\text{CD}_3\text{OD}$  as the solvents with tetramethylsilane (TMS) as the internal standard at 25 °C.  $\text{K}_2\text{CO}_3$  (99.997%) and  $\text{K}_2\text{S}_2\text{O}_8$  (99.99%) were purchased from Alfa Aesar. Other chemicals were purchased as reagent grade and used without further purification. All reactions were performed under an Ar atmosphere in a 25 mL sealed tube unless otherwise noted.

Abbreviations in this paper: DMF: *N,N*-Dimethylformamide; DMSO: Dimethyl sulfoxide; DCE: 1,2-Dichloroethane; Ar: Argon; TEMPO: 2,2,6,6-Tetramethylpiperidine 1-oxyl; BHT: 2,6-di-*tert*-butyl-*p*-cresol

## 2. Experimental procedures

### (1) General procedure for synthesis of 2-isocyanobiphenyls:

2-Isocyanobiphenyls were prepared according to the reported method.<sup>1</sup>

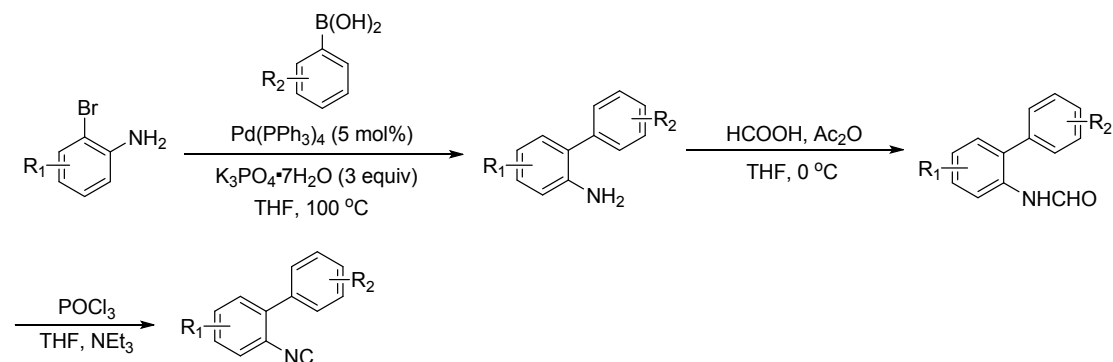

**Scheme 1** General procedure for synthesis of 2-isocyanobiphenyls

### (2) General procedure for synthesis of 6-alkyl/acyl phenanthridines:

General procedure: A 25 mL oven-dried sealed tube was charged with 2-isocyanobiphenyls (**1**, 0.20 mmol, 1.0 equiv), amine acids (**2**, 0.40 mmol, 2.0 equiv), K<sub>2</sub>CO<sub>3</sub> (55 mg, 0.40 mmol, 2.0 equiv) and K<sub>2</sub>S<sub>2</sub>O<sub>8</sub> (216 mg, 0.80 mmol, 4.0 equiv) in CH<sub>3</sub>CN/H<sub>2</sub>O (6.0 mL, v/v = 5:1). The tube was sealed and heated at 100 °C for 1 h under an Ar atmosphere. After completion of the reaction, the reaction mixture was added water (5 mL), and then extracted with dichloromethane (3 × 5 mL). The combined organic layers were dried over anhydrous Na<sub>2</sub>SO<sub>4</sub> and evaporated under reduced pressure. The residue was purified by flash column chromatography on silica gel (eluent: petroleum ether/ethyl acetate = 100:1) to afford **3**.

### (3) Experimental procedure for synthesis of 1,3-dimethyl-3-neopentylindolin- 2-one (**3y**):

Following procedure for synthesis of 6-alkyl/aryl phenanthridines, **3y** was obtained by employing *N*-methyl-*N*-(*p*-tolyl)methacrylamide as the substrate instead of 2-isocyanobiphenyl **1a** in 38% yield.

### (4) Experimental procedure for mechanistic studies with TEMPO:

To a mixture of 2-isocyanobiphenyl **1a** (0.20 mmol), L-tert-Leucine **2a** (0.40 mmol), and K<sub>2</sub>CO<sub>3</sub> (0.40 mmol), TEMPO (0.40 mmol) in CH<sub>3</sub>CN/H<sub>2</sub>O (6.0 mL, v/v = 5:1) was added K<sub>2</sub>S<sub>2</sub>O<sub>8</sub> (0.80 mmol). The reaction was allowed to stir at 100 °C for 1 h under an Ar atmosphere. After completion of the reaction, no desired product was detected by LC-MS.

**(5) Experimental procedure for mechanistic studies with BHT:**

The experimental procedure is the same as above (4), and no desired product was detected by LC-MS.

**(6) Experimental procedure for synthesis of 6-isopropylphenanthridine with isobutyraldehyde as a radical precursor:**

Following the procedure for synthesis of general procedure for synthesis of 6-alkyl/acyl phenanthridines, **3n** was obtained in 35% yield.

### 3. Spectroscopic data

#### 6-(*tert*-butyl)phenanthridine (**3a**)<sup>2</sup>

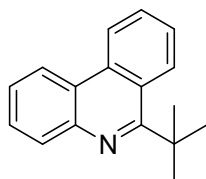

Colorless oil, 78% yield.

<sup>1</sup>H NMR (400 MHz, CDCl<sub>3</sub>) δ 8.69 (d, *J* = 8.2 Hz, 1H), 8.64 (d, *J* = 8.4 Hz, 1H), 8.53 (d, *J* = 8.1 Hz, 1H), 8.13 (d, *J* = 7.7 Hz, 1H), 7.75-7.83 (m, 1H), 7.57-7.73 (m, 3H), 1.74 (s, 9H);

<sup>13</sup>C NMR (100 MHz, CDCl<sub>3</sub>) δ 166.8, 143.1, 134.2, 130.4, 129.4, 128.5, 128.4, 126.6, 126.1, 124.5, 123.6, 123.1, 121.7, 40.3, 31.3.

HRMS (ESI-TOF) calcd for C<sub>17</sub>H<sub>18</sub>N [M + H]<sup>+</sup> (236.1434), found 236.1430.

#### 6-(*tert*-butyl)-2-methylphenanthridine (**3b**)<sup>3</sup>

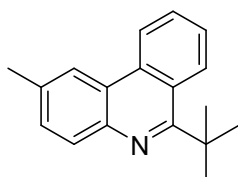

Colorless oil, 72% yield.

<sup>1</sup>H NMR (400 MHz, CDCl<sub>3</sub>) δ 8.67 (d, *J* = 8.4 Hz, 1H), 8.61 (d, *J* = 8.4 Hz, 1H), 8.31 (s, 1H), 8.01 (d, *J* = 8.4 Hz, 1H), 7.74-7.78 (m, 1H), 7.61-7.65 (m, 1H), 7.52 (dd, *J* = 8.0, 1.6 Hz, 1H), 2.62 (s, 3H), 1.73 (s, 9H);

<sup>13</sup>C NMR (100 MHz, CDCl<sub>3</sub>) δ 165.7, 141.3, 136.2, 133.9, 130.12, 130.08, 129.1, 128.3, 125.8, 124.5, 123.3, 123.0, 121.3, 40.1, 31.3, 22.1.

HRMS (ESI-TOF) calcd for C<sub>18</sub>H<sub>20</sub>N [M + H]<sup>+</sup> (250.1590), found 250.1593.

#### 6-(*tert*-butyl)-8-methoxy-2-methylphenanthridine (**3c**)<sup>3</sup>

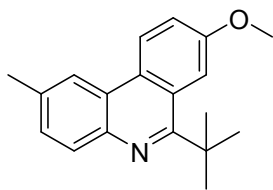

Colorless oil, 68% yield.

$^1\text{H}$  NMR (400 MHz,  $\text{CDCl}_3$ )  $\delta$  8.58 (d,  $J = 8.8$  Hz, 1H), 8.22 (s, 1H), 7.98 (d,  $J = 6.0$  Hz, 1H), 7.97 (s, 1H), 7.46 (dd,  $J = 8.4, 1.6$  Hz, 1H), 7.41 (dd,  $J = 8.8, 2.4$  Hz, 1H), 3.99 (s, 3H), 2.60 (s, 3H), 1.73 (s, 9H);

$^{13}\text{C}$  NMR (100 MHz,  $\text{CDCl}_3$ )  $\delta$  164.8, 157.2, 140.6, 136.3, 130.0, 129.2, 128.1, 125.6, 124.5, 123.4, 120.8, 119.0, 109.7, 55.5, 40.0, 31.1, 22.1.

HRMS (ESI-TOF) calcd for  $\text{C}_{19}\text{H}_{22}\text{NO}$   $[\text{M} + \text{H}]^+$  (280.1696), found 280.1695.

### 6-(*tert*-butyl)-8-methoxyphenanthridine (3d)<sup>4</sup>

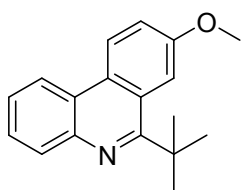

Colorless oil, 81% yield.

$^1\text{H}$  NMR (400 MHz,  $\text{CDCl}_3$ )  $\delta$  8.60 (d,  $J = 9.2$  Hz, 1H), 8.44 (dd,  $J = 8.0, 1.2$  Hz, 1H), 8.09 (dd,  $J = 8.0, 1.2$  Hz, 1H), 7.99 (d,  $J = 2.4$  Hz, 1H), 7.56-7.64 (m, 2H), 7.44 (dd,  $J = 8.0, 1.2$  Hz, 1H), 4.00 (s, 3H), 1.74 (s, 9H);

$^{13}\text{C}$  NMR (100 MHz,  $\text{CDCl}_3$ )  $\delta$  165.8, 157.4, 142.3, 130.3, 128.3, 127.5, 126.6, 125.6, 124.5, 123.6, 121.2, 119.2, 109.8, 55.6, 40.1, 31.1.

HRMS (ESI-TOF) calcd for  $\text{C}_{18}\text{H}_{20}\text{NO}$   $[\text{M} + \text{H}]^+$  (266.1539), found 266.1540.

### 6-(*tert*-butyl)-2-fluorophenanthridine (3e)<sup>5</sup>

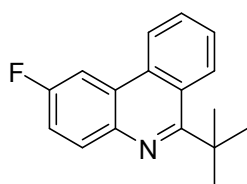

Colorless oil, 70% yield.

$^1\text{H}$  NMR (400 MHz,  $\text{CDCl}_3$ )  $\delta$  8.64 (d,  $J = 8.4$  Hz, 1H), 8.54 (d,  $J = 8.0$  Hz, 1H), 8.09-8.13 (m, 2H), 7.77-7.81 (m, 1H), 7.66-7.70 (m, 1H), 7.40-7.45 (m, 1H), 1.73 (s, 9H);

$^{13}\text{C}$  NMR (100 MHz,  $\text{CDCl}_3$ )  $\delta$  165.9 (d,  $J = 2.5$  Hz), 161.2 (d,  $J = 244.0$  Hz), 139.9, 133.5 (d,  $J = 4.1$  Hz), 132.5 (d,  $J = 9.1$  Hz), 129.4, 128.4, 126.6, 124.7 (d,  $J = 9.1$  Hz), 124.4, 123.2, 117.2 (d,  $J = 24.0$  Hz), 106.6 (d,  $J = 23.1$  Hz), 40.2, 31.2.

HRMS (ESI-TOF) calcd for  $\text{C}_{17}\text{H}_{17}\text{FN}$   $[\text{M} + \text{H}]^+$  (254.1340), found 254.1343.

### 6-(*tert*-butyl)-8-fluoro-2-methylphenanthridine (3f)

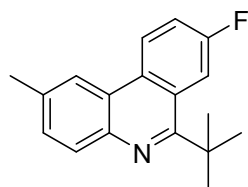

Colorless oil, 65% yield.

$^1\text{H}$  NMR (400 MHz,  $\text{CDCl}_3$ )  $\delta$  8.64-8.67 (m, 1H), 8.20-8.24 (m, 2H), 8.00 (d,  $J = 8.0$  Hz, 1H), 7.50-7.54 (m, 2H), 2.61 (s, 3H), 1.70 (s, 9H);

$^{13}\text{C}$  NMR (100 MHz,  $\text{CDCl}_3$ )  $\delta$  164.8 (d,  $J = 3.8$  Hz), 160.2 (d,  $J = 244.1$  Hz), 141.0, 136.7, 130.5, 130.2, 130.0, 125.5 (d,  $J = 7.6$  Hz), 125.5 (d,  $J = 8.6$  Hz), 122.9, 121.1, 118.2 (d,  $J = 23.6$  Hz), 113.1 (d,  $J = 22.1$  Hz), 40.1, 31.1, 22.1.

HRMS (ESI-TOF) calcd for  $\text{C}_{18}\text{H}_{19}\text{FN}$   $[\text{M} + \text{H}]^+$  (268.1496), found 268.1498.

### 6-(*tert*-butyl)-9-methoxyphenanthridine (3g) and 6-(*tert*-butyl)-7-methoxyphenanthridine (3h)

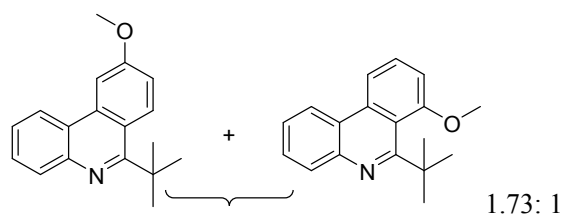

Colorless oil, 62% yield.

$^1\text{H}$  NMR (400 MHz,  $\text{CDCl}_3$ )  $\delta$  8.56 (d,  $J = 9.2$  Hz, 1H), 8.45 (d,  $J = 8.4$  Hz, 2H), 8.26 (d,  $J = 8.0$  Hz, 1H), 8.09 (dd,  $J = 8.4, 1.2$  Hz, 1H), 8.04 (dd,  $J = 8.4, 1.2$  Hz, 1H), 8.00 (d,  $J = 2.4$  Hz, 1H), 7.64-7.72 (m, 3H), 7.53-7.60 (m, 2H), 7.24 (dd,  $J = 8.0, 2.8$  Hz, 1H), 7.10 (d,  $J = 7.6$  Hz, 1H), 4.04 (s, 3H), 4.02 (s, 3H), 1.71 (s, 9H), 1.62 (s, 9H);

$^{13}\text{C}$  NMR (100 MHz,  $\text{CDCl}_3$ )  $\delta$  166.45, 166.42, 159.9, 156.9, 143.4, 142.5, 136.38, 136.35, 130.4, 130.1, 129.9, 129.7, 128.54, 128.49, 126.2, 126.1, 123.4, 122.7, 122.2, 121.7, 119.3, 117.1, 115.9, 115.0, 108.4, 103.7, 55.5, 54.6, 42.2, 40.1, 31.3, 31.0.

HRMS (ESI-TOF) calcd for  $\text{C}_{18}\text{H}_{20}\text{NO}$   $[\text{M} + \text{H}]^+$  (266.1539), found 266.1541.

### 5-(*tert*-butyl)benzo[*c*][2,7]naphthyridine (3i)

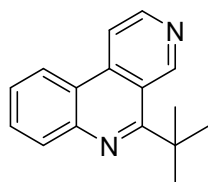

Colorless oil, 47% yield.

$^1\text{H}$  NMR (400 MHz,  $\text{CDCl}_3$ )  $\delta$  10.03 (s, 1H), 8.86 (d,  $J = 5.2$  Hz, 1H), 8.50 (d,  $J = 8.0$  Hz, 1H), 8.44 (d,  $J = 5.2$  Hz, 1H), 8.16 (d,  $J = 8.0$  Hz, 1H), 7.79-7.84 (m, 1H), 7.65-7.69 (m, 1H), 1.75 (s, 9H);

$^{13}\text{C}$  NMR (100 MHz,  $\text{CDCl}_3$ )  $\delta$  166.7, 151.4, 146.9, 144.3, 139.3, 130.8, 130.6, 127.2, 122.2, 121.4, 119.7, 116.4, 40.3, 31.4.

HRMS (ESI-TOF) calcd for  $\text{C}_{16}\text{H}_{17}\text{N}_2$   $[\text{M} + \text{H}]^+$  (237.1386), found 237.1383.

### 6-(*sec*-butyl)phenanthridine (3j)

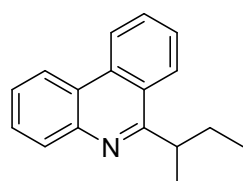

Colorless oil, 64% yield.



$^1\text{H}$  NMR (400 MHz,  $\text{CDCl}_3$ )  $\delta$  8.67 (d,  $J = 8.0$  Hz, 1H), 8.55 (dd,  $J = 8.0, 1.2$  Hz, 1H), 8.33 (d,  $J = 8.4$  Hz, 1H), 8.16 (d,  $J = 8.0$  Hz, 1H), 7.80-7.84 (m, 1H), 7.67-7.73 (m, 2H), 7.60-7.64 (m, 1H), 3.73-3.82 (m, 1H), 2.13-2.24 (m, 1H), 1.78-1.88 (m, 1H), 1.50 (d,  $J = 6.8$  Hz, 3H), 1.00 (t,  $J = 7.2$  Hz, 3H);

$^{13}\text{C}$  NMR (100 MHz,  $\text{CDCl}_3$ )  $\delta$  165.5, 143.9, 133.1, 130.02, 129.98, 128.4, 127.2, 126.2, 125.7, 125.3, 123.4, 122.6, 121.9, 38.4, 29.2, 19.9, 12.5.

HRMS (ESI-TOF) calcd for  $\text{C}_{17}\text{H}_{18}\text{N}$   $[\text{M} + \text{H}]^+$  (236.1434), found 236.1430.

### 6-(*sec*-butyl)-8-methoxy-2-methylphenanthridine (3k)

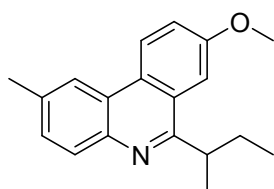

Colorless oil, 73% yield.

$^1\text{H}$  NMR (400 MHz,  $\text{CDCl}_3$ )  $\delta$  8.56 (d,  $J = 8.8$  Hz, 1H), 8.24 (s, 1H), 8.00 (d,  $J = 8.0$  Hz, 1H), 7.63 (d,  $J = 2.4$  Hz, 1H), 7.47 (dd,  $J = 8.4, 2.0$  Hz, 1H), 7.44 (dd,  $J = 8.8, 2.4$  Hz, 1H), 4.00 (s, 3H), 3.61-3.69 (m, 1H), 2.60 (s, 3H), 2.11-2.21 (m, 1H), 1.75-1.87 (m, 1H), 1.48 (d,  $J = 6.8$  Hz, 3H), 0.98 (t,  $J = 7.2$  Hz, 3H);

$^{13}\text{C}$  NMR (100 MHz,  $\text{CDCl}_3$ )  $\delta$  163.5, 158.5, 141.4, 136.0, 129.7, 129.2, 127.2, 126.7, 124.2, 123.3, 121.0, 119.8, 106.4, 55.6, 38.5, 29.1, 22.0, 19.7, 12.6.

HRMS (ESI-TOF) calcd for  $\text{C}_{19}\text{H}_{22}\text{NO}$   $[\text{M} + \text{H}]^+$  (280.1696), found 280.1695.

### 6-(*sec*-butyl)-8-fluoro-2-methylphenanthridine (3l)

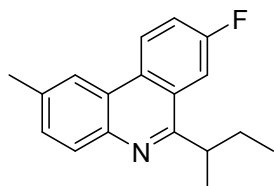

Colorless oil, 66% yield.

$^1\text{H}$  NMR (400 MHz,  $\text{CDCl}_3$ )  $\delta$  8.61-8.64 (m, 1H), 8.26 (s, 1H), 8.03 (d,  $J = 8.0$  Hz,

1H), 7.90 (dd,  $J = 10.4, 2.8$  Hz, 1H), 7.51-7.56 (m, 2H), 3.55-3.64 (m, 1H), 2.61 (s, 3H), 2.09-2.19 (m, 1H), 1.75-1.85 (m, 1H), 1.47 (d,  $J = 6.8$  Hz, 3H), 0.97 (t,  $J = 7.2$  Hz, 3H);

$^{13}\text{C}$  NMR (100 MHz,  $\text{CDCl}_3$ )  $\delta$  163.6 (d,  $J = 3.8$  Hz), 161.5 (d,  $J = 245.3$  Hz), 141.9, 136.4, 130.0, 129.9, 129.5, 126.7 (d,  $J = 7.3$  Hz), 125.1 (d,  $J = 8.4$  Hz), 122.7, 121.3, 118.9 (d,  $J = 23.6$  Hz), 110.3 (d,  $J = 21.4$  Hz), 38.5, 29.1, 22.0, 19.7, 12.5.

HRMS (ESI-TOF) calcd for  $\text{C}_{18}\text{H}_{19}\text{FN}$   $[\text{M} + \text{H}]^+$  (268.1496), found 268.1494.

### 6-(*sec*-butyl)-2-fluorophenanthridine (3m)

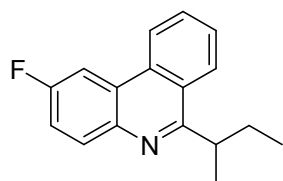

Colorless oil, 62% yield.

$^1\text{H}$  NMR (400 MHz,  $\text{CDCl}_3$ )  $\delta$  8.50 (d,  $J = 8.2$  Hz, 1H), 8.31 (d,  $J = 8.2$  Hz, 1H), 8.16 – 8.08 (m, 2H), 7.80 (ddd,  $J = 8.2, 7.0, 1.3$  Hz, 1H), 7.70 (ddd,  $J = 8.3, 7.0, 1.3$  Hz, 1H), 7.45 – 7.39 (m, 1H), 3.73 (q,  $J = 6.8$  Hz, 1H), 2.19-2.08 (m, 1H), 1.86 – 1.73 (m, 1H), 1.46 (d,  $J = 6.8$  Hz, 3H), 0.97 (t,  $J = 7.4$  Hz, 3H);

$^{13}\text{C}$  NMR (100 MHz,  $\text{CDCl}_3$ )  $\delta$  164.7 (d,  $J = 2.8$  Hz), 161.0 (d,  $J = 244$  Hz), 140.8, 132.5 (d,  $J = 3.9$  Hz), 132.1 (d,  $J = 8.8$  Hz), 130.3, 127.8, 125.8, 125.3, 124.6 (d,  $J = 9.0$  Hz), 122.8, 117.2 (d,  $J = 23.9$  Hz), 106.8 (d,  $J = 22.7$  Hz), 38.3, 29.2, 19.8, 12.5.

HRMS (ESI-TOF) calcd for  $\text{C}_{17}\text{H}_{17}\text{FN}$   $[\text{M} + \text{H}]^+$  (254.1340), found 254.1342.

### 6-isopropylphenanthridine (3n)<sup>6</sup>

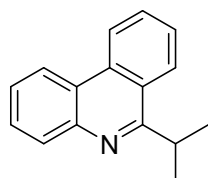

Colorless oil, 58% yield.

$^1\text{H}$  NMR (400 MHz,  $\text{CDCl}_3$ )  $\delta$  8.65 (d,  $J = 8.4$  Hz, 1H), 8.53 (dd,  $J = 8.0, 1.2$  Hz, 1H), 8.32 (d,  $J = 8.4$  Hz, 1H), 8.14 (dd,  $J = 8.0, 1.2$  Hz, 1H), 7.79-7.83 (m, 1H), 7.66-7.72 (m, 2H), 7.58-7.62 (m, 1H), 3.95-4.05 (m, 1H), 1.52 (d,  $J = 6.8$  Hz, 6H);

$^{13}\text{C}$  NMR (100 MHz,  $\text{CDCl}_3$ )  $\delta$  165.8, 143.8, 133.0, 129.94, 129.92, 128.4, 127.1, 126.2, 125.7, 124.7, 123.4, 122.6, 121.8, 31.5, 22.0.

HRMS (ESI-TOF) calcd for  $\text{C}_{16}\text{H}_{16}\text{N}$  [ $\text{M} + \text{H}$ ] $^+$  (222.1277), found 222.1280.

### 6-cyclohexylphenanthridine (3o)<sup>7</sup>

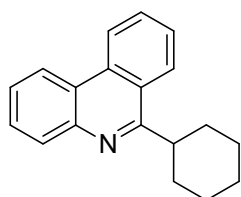

Colorless oil, 68% yield.

$^1\text{H}$  NMR (400 MHz,  $\text{CDCl}_3$ )  $\delta$  8.63 (d,  $J = 8.3$  Hz, 1H), 8.52 (d,  $J = 8.2$  Hz, 1H), 8.31 (d,  $J = 8.3$  Hz, 1H), 8.14 (d,  $J = 8.1$  Hz, 1H), 7.80 (t,  $J = 7.6$  Hz, 1H), 7.72 – 7.65 (m, 2H), 7.62 – 7.57 (m, 1H), 3.65 – 3.57 (m, 1H), 2.12 – 2.04 (m, 2H), 2.01 – 1.80 (m, 5H), 1.63 – 1.52 (m, 2H), 1.50 – 1.40 (m, 1H).

$^{13}\text{C}$  NMR (100 MHz,  $\text{CDCl}_3$ )  $\delta$  165.59, 144.18, 133.30, 130.23, 128.69, 127.37, 126.43, 125.92, 125.02, 123.64, 122.88, 122.12, 42.30, 32.61, 27.20, 26.64.

HRMS (ESI-TOF) calcd for  $\text{C}_{19}\text{H}_{20}\text{N}$  [ $\text{M} + \text{H}$ ] $^+$  (262.1590), found 262.1587.

### 1-(phenanthridin-6-yl)ethan-1-one (3p)<sup>8</sup>

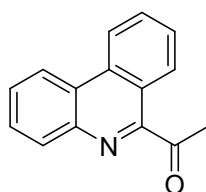

Colorless oil, 60% yield.

$^1\text{H}$  NMR (400 MHz,  $\text{CDCl}_3$ )  $\delta$  8.90 (d,  $J = 8.3$  Hz, 1H), 8.67 (d,  $J = 8.3$  Hz, 1H), 8.58-8.63 (m, 1H), 8.22-8.26 (m, 1H), 7.87 (ddd,  $J = 8.3, 7.1, 1.3$  Hz, 1H), 7.71-7.80

(m, 3H), 2.96 (s, 3H);

$^{13}\text{C}$  NMR (100 MHz,  $\text{CDCl}_3$ )  $\delta$  203.0, 154.0, 142.6, 133.7, 131.2, 130.9, 129.1, 129.0, 128.3, 128.0, 125.5, 123.2, 122.2, 122.2, 28.7.

HRMS (ESI-TOF) calcd for  $\text{C}_{15}\text{H}_{12}\text{NO}$   $[\text{M} + \text{H}]^+$  (222.0913), found 222.0910.

### 3-methyl-1-(phenanthridin-6-yl)butan-1-one (3q)

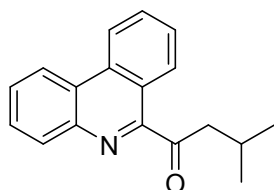

Colorless oil, 67% yield.

$^1\text{H}$  NMR (400 MHz,  $\text{CDCl}_3$ )  $\delta$  8.68 (dd,  $J = 8.4, 0.6$  Hz, 1H), 8.60 (d,  $J = 8.3$  Hz, 1H), 8.52-8.55 (m, 1H), 8.14-8.19 (m, 1H), 7.80 (ddd,  $J = 8.3, 7.1, 1.3$  Hz, 1H), 7.62-7.74 (m, 3H), 3.22 (d,  $J = 6.9$  Hz, 2H), 2.32 (dt,  $J = 13.5, 6.7$  Hz, 1H), 1.00 (d,  $J = 6.7$  Hz, 6H);

$^{13}\text{C}$  NMR (100 MHz,  $\text{CDCl}_3$ )  $\delta$  205.0, 155.1, 142.7, 133.7, 131.1, 130.9, 129.0, 128.8, 128.2, 127.8, 125.3, 123.2, 122.2, 49.4, 25.2, 23.0.

HRMS (ESI-TOF) calcd for  $\text{C}_{18}\text{H}_{18}\text{NO}$   $[\text{M} + \text{H}]^+$  (264.1383), found 264.1379.

### 1-(phenanthridin-6-yl)-3-phenylpropan-1-one (3r)

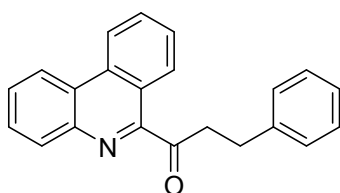

Colorless oil, 54% yield.

$^1\text{H}$  NMR (300 MHz,  $\text{CDCl}_3$ )  $\delta$  8.79 (d,  $J = 8.4$  Hz, 1H), 8.67 (d,  $J = 8.4$  Hz, 1H), 8.61 (d,  $J = 9.0$  Hz, 1H), 8.20-8.23 (m, 1H), 7.69-7.90 (m, 4H), 7.21-7.33 (m, 5H), 3.78 (t,  $J = 7.5$  Hz, 2H), 3.18 (t,  $J = 7.5$  Hz, 2H);

$^{13}\text{C}$  NMR (75 MHz,  $\text{CDCl}_3$ )  $\delta$  203.9, 154.1, 142.6, 141.4, 133.6, 131.1, 130.9, 129.0,

128.9, 128.62, 128.55, 128.1, 127.8, 126.1, 125.4, 123.2, 122.2, 122.1, 42.1, 30.3.

HRMS (ESI-TOF) calcd for C<sub>22</sub>H<sub>18</sub>NO [M + H]<sup>+</sup> (312.1383), found 312.1385.

### 3-methyl-1-(2-methylphenanthridin-6-yl)butan-1-one (3s)

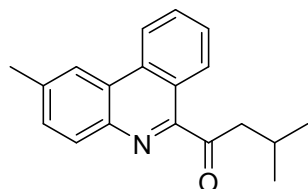

Colorless oil, 62% yield.

<sup>1</sup>H NMR (400 MHz, CDCl<sub>3</sub>) δ 8.78 (dd, *J* = 8.4, 0.4 Hz, 1H), 8.65 (d, *J* = 8.4 Hz, 1H), 8.38 (s, 1H), 8.12 (d, *J* = 8.4 Hz, 1H), 7.82-7.87 (m, 1H), 7.68-7.72 (m, 1H), 7.61 (dd, *J* = 8.4, 1.6 Hz, 1H), 3.29 (d, *J* = 7.2 Hz, 2H), 2.66 (s, 3H), 2.32-2.43 (m, 1H), 1.07 (d, *J* = 6.8 Hz, 6H);

<sup>13</sup>C NMR (100 MHz, CDCl<sub>3</sub>) δ 205.0, 154.0, 140.9, 139.0, 133.3, 130.80, 130.76, 130.6, 128.0, 127.7, 125.1, 123.3, 122.1, 121.8, 49.3, 25.2, 23.0, 22.3.

HRMS (ESI-TOF) calcd for C<sub>19</sub>H<sub>20</sub>NO [M + H]<sup>+</sup> (278.1539), found 278.1536.

### 1-(8-fluoro-2-methylphenanthridin-6-yl)ethan-1-one (3t)

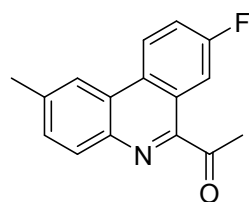

Colorless oil, 56% yield.

<sup>1</sup>H NMR (400 MHz, CDCl<sub>3</sub>) δ 8.77 (dd, *J* = 10.8, 2.8 Hz, 1H), 8.61-8.65 (m, 1H), 8.31 (s, 1H), 8.12 (d, *J* = 8.4 Hz, 1H), 7.57-7.62 (m, 2H), 2.94 (s, 3H), 2.66 (s, 3H);

<sup>13</sup>C NMR (100 MHz, CDCl<sub>3</sub>) δ 202.6, 162.0 (d, *J* = 246.4 Hz), 151.2 (d, *J* = 4.4 Hz), 140.6, 139.9, 131.1, 130.7, 130.1, 125.1, 124.6 (d, *J* = 9.2 Hz), 124.4 (d, *J* = 8.7 Hz), 121.6, 119.9 (d, *J* = 24.2 Hz), 112.8 (d, *J* = 23.3 Hz), 28.4, 22.4.

HRMS (ESI-TOF) calcd for C<sub>16</sub>H<sub>13</sub>FNO [M + H]<sup>+</sup> (254.0976), found 254.0977.

### 1-(8-methoxy-2-methylphenanthridin-6-yl)-3-methylbutan-1-one (3u)

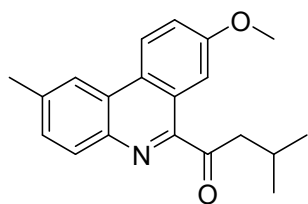

Colorless oil, 67% yield.

$^1\text{H}$  NMR (400 MHz,  $\text{CDCl}_3$ )  $\delta$  8.54 (d,  $J = 9.2$  Hz, 1H), 8.36 (d,  $J = 2.4$  Hz, 1H), 8.28 (s, 1H), 8.09 (d,  $J = 8.4$  Hz, 1H), 7.54 (dd,  $J = 8.4, 1.6$  Hz, 1H), 7.47 (dd,  $J = 9.2, 2.8$  Hz, 1H), 3.99 (s, 3H), 3.32 (d,  $J = 6.8$  Hz, 2H), 2.64 (s, 3H), 2.34-2.44 (m, 1H), 1.07 (d,  $J = 6.4$  Hz, 6H);

$^{13}\text{C}$  NMR (100 MHz,  $\text{CDCl}_3$ )  $\delta$  205.3, 159.3, 152.1, 140.2, 139.2, 130.8, 129.8, 127.9, 125.5, 124.9, 123.6, 121.9, 121.3, 107.0, 55.6, 49.1, 25.3, 23.0, 22.3.

HRMS (ESI-TOF) calcd for  $\text{C}_{20}\text{H}_{22}\text{NO}_2$   $[\text{M} + \text{H}]^+$  (308.1645), found 308.1642.

### 1-(2-fluorophenanthridin-6-yl)-3-methylbutan-1-one (3v)

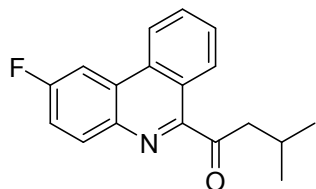

Colorless oil, 61% yield.

$^1\text{H}$  NMR (400 MHz,  $\text{CDCl}_3$ )  $\delta$  8.80 (dd,  $J = 8.4, 0.8$  Hz, 1H), 8.50 (d,  $J = 8.4$  Hz, 1H), 8.20-8.23 (m, 1H), 8.16 (d,  $J = 10.0$  Hz, 1H), 7.84-7.88 (m, 1H), 7.73-7.77 (m, 1H), 7.48-7.53 (m, 1H), 3.28 (d,  $J = 6.8$  Hz, 2H), 2.33-2.44 (m, 1H), 1.07 (d,  $J = 6.8$  Hz, 6H);

$^{13}\text{C}$  NMR (100 MHz,  $\text{CDCl}_3$ )  $\delta$  204.6, 162.5 (d,  $J = 248.2$  Hz), 154.1 (d,  $J = 2.8$  Hz), 139.4, 133.4 (d,  $J = 9.4$  Hz), 133.0 (d,  $J = 4.3$  Hz), 130.9, 128.7, 127.9, 126.8 (d,  $J = 9.4$  Hz), 123.2, 122.3, 118.1 (d,  $J = 24.4$  Hz), 107.2 (d,  $J = 23.3$  Hz), 49.2, 25.1, 22.9.

HRMS (ESI-TOF) calcd for  $\text{C}_{18}\text{H}_{17}\text{FNO}$   $[\text{M} + \text{H}]^+$  (282.1289), found 282.1292.

### 1-(8-fluoro-2-methylphenanthridin-6-yl)-3-methylbutan-1-one (3w)

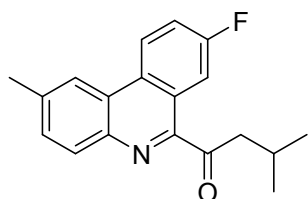

Colorless oil, 59% yield.

$^1\text{H}$  NMR (400 MHz,  $\text{CDCl}_3$ )  $\delta$  8.62 (dd,  $J = 10.8, 2.8$  Hz, 2H), 8.28 (s, 1H), 8.11 (d,  $J = 8.4$  Hz, 1H), 7.55-7.60 (m, 2H), 3.30 (d,  $J = 7.2$  Hz, 2H), 2.65 (s, 3H), 2.33-2.44 (m, 1H), 1.07 (d,  $J = 6.8$  Hz, 6H);

$^{13}\text{C}$  NMR (100 MHz,  $\text{CDCl}_3$ )  $\delta$  204.6, 161.9 (d,  $J = 246.5$  Hz), 152.1, 140.6, 139.7, 131.0, 130.7, 130.0, 124.9, 124.6, 124.5 (d,  $J = 8.5$  Hz), 121.5, 119.9 (d,  $J = 24.1$  Hz), 112.5 (d,  $J = 23.2$  Hz), 48.8, 25.3, 22.9, 22.3.

HRMS (ESI-TOF) calcd for  $\text{C}_{19}\text{H}_{19}\text{FNO}$  [ $\text{M} + \text{H}$ ] $^+$  (296.1445), found 296.1447.

### 1-(benzo[*c*][2,7]naphthyridin-5-yl)ethan-1-one (3x)

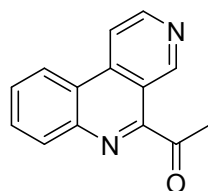

Colorless oil, 42% yield.

$^1\text{H}$  NMR (400 MHz,  $\text{CDCl}_3$ )  $\delta$  10.30 (s, 1H), 8.96 (d,  $J = 5.6$  Hz, 1H), 8.60 (dd,  $J = 8.4, 0.8$  Hz, 1H), 8.41 (d,  $J = 5.6$  Hz, 1H), 8.30 (dd,  $J = 8.4, 0.8$  Hz, 1H), 7.91-7.95 (m, 1H), 7.83-7.87 (m, 1H), 2.98 (s, 3H);

$^{13}\text{C}$  NMR (100 MHz,  $\text{CDCl}_3$ )  $\delta$  201.8, 153.1, 152.2, 148.6, 143.8, 138.2, 131.5, 131.2, 129.7, 123.5, 122.7, 118.6, 115.2, 28.1.

HRMS (ESI-TOF) calcd for  $\text{C}_{14}\text{H}_{11}\text{N}_2\text{O}$  [ $\text{M} + \text{H}$ ] $^+$  (223.0866), found 223.0863.

### 1,3,5-trimethyl-3-neopentylindolin-2-one (3y)<sup>9</sup>

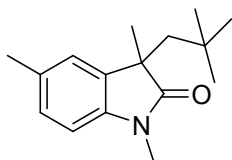

Colorless oil, 38% yield.

$^1\text{H}$  NMR (400 MHz,  $\text{CDCl}_3$ )  $\delta$  7.05 (d,  $J = 7.9$  Hz, 1H), 7.01 (s, 1H), 6.73 (d,  $J = 7.8$  Hz, 1H), 3.20 (s, 3H), 2.34 (s, 3H), 2.14 (d,  $J = 14.4$  Hz, 1H), 1.83 (d,  $J = 14.4$  Hz, 1H), 1.58 (s, 2H), 1.28 (s, 3H), 0.61 (s, 9H).

$^{13}\text{C}$  NMR (100 MHz,  $\text{CDCl}_3$ )  $\delta$  181.1, 140.6, 134.4, 131.5, 127., 124.8, 107.8, 50.9, 47.5, 31.9, 30.9, 28.4, 26.4, 21.3.

HRMS (ESI-TOF) calcd for  $\text{C}_{16}\text{H}_{24}\text{NO}$   $[\text{M} + \text{H}]^+$  (246.1852), found 246.1850.



#### **4. References**

1. Wang, Q. L.; Dong, X. C.; Xiao, T. B.; Zhou, L. *Org. Lett.* **2013**, *15*, 4846.
2. Lysén, M.; Kristensen, J. L.; Vedsó, P.; Begtrup, M. *Org. Lett.* **2002**, *4*, 257.
3. Wang, B.; Dai, Y.; Tong, W.; Gong, H. *Org. Biomol. Chem.* **2015**, *13*, 11418.
4. Sahoo, M. K.; Midya, S. P.; Landge, V. G.; Balaraman, E. *Green Chem.* **2017**, *19*, 2111.
5. Yao, Q.; Zhou, X.; Zhang, X.; Wang, C.; Wang, P.; Li, M. *Org. Biomol. Chem.* **2017**, *15*, 957.
6. Chen, Y.-F.; Hsieh, J.-C. *Org. Lett.* **2014**, *16*, 4642.
7. Sha, W.; Yu, J. T.; Jiang, Y.; Yang, H.; Cheng, J. *Chem. Commun.* **2014**, *50*, 9179.
8. Liu, J.; Fan, C.; Yin, H.; Qin, C.; Zhang, G.; Zhang, X.; Yi, H.; Lei, A. *Chem. Comm.* **2014**, *50*, 2145.
9. Yang, L.; Lu, W.; Zhou, W.; Zhang, F. *Green Chem.* **2016**, *18*, 2941.



# 6-(*tert*-butyl)-2-methylphenanthridine (3b)

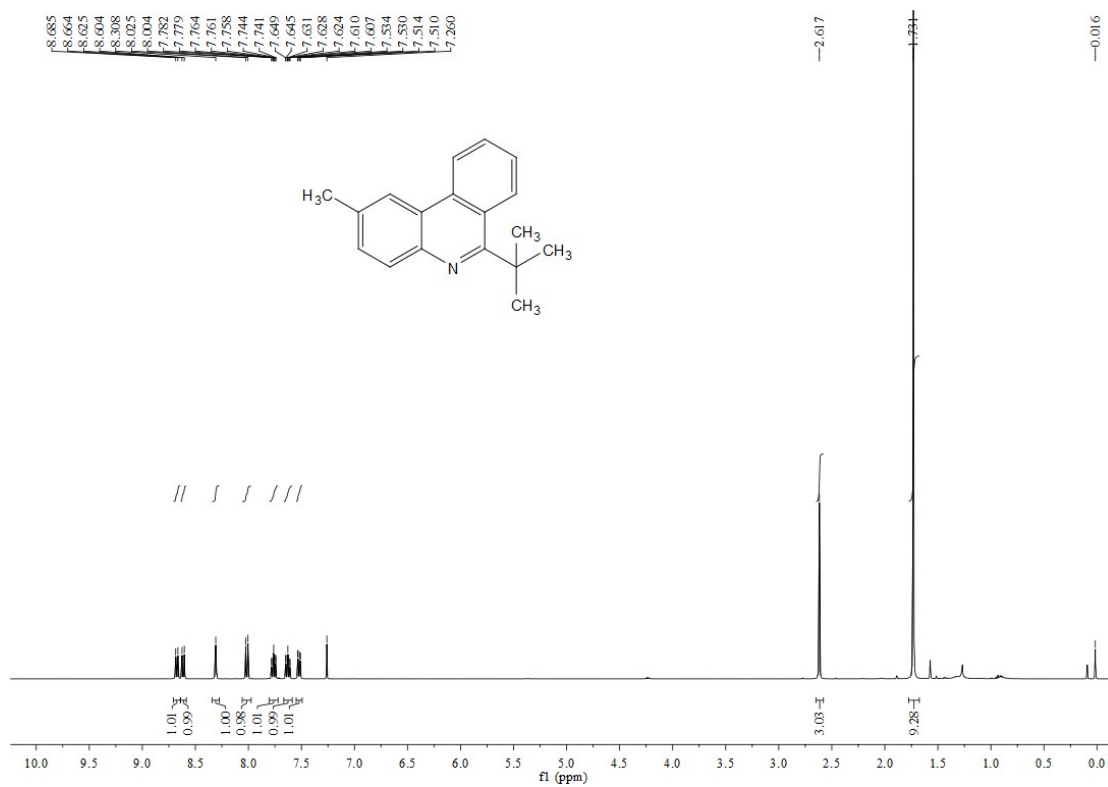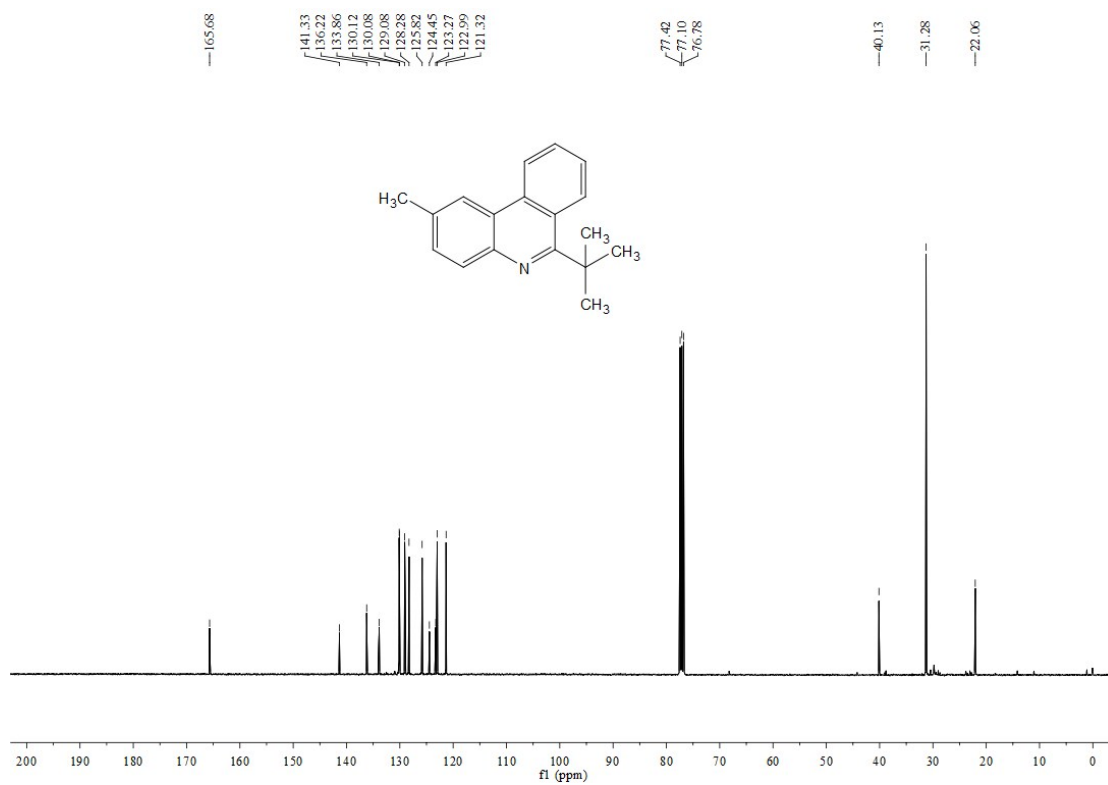

# 6-(*tert*-butyl)-8-methoxy-2-methylphenanthridine (3c)

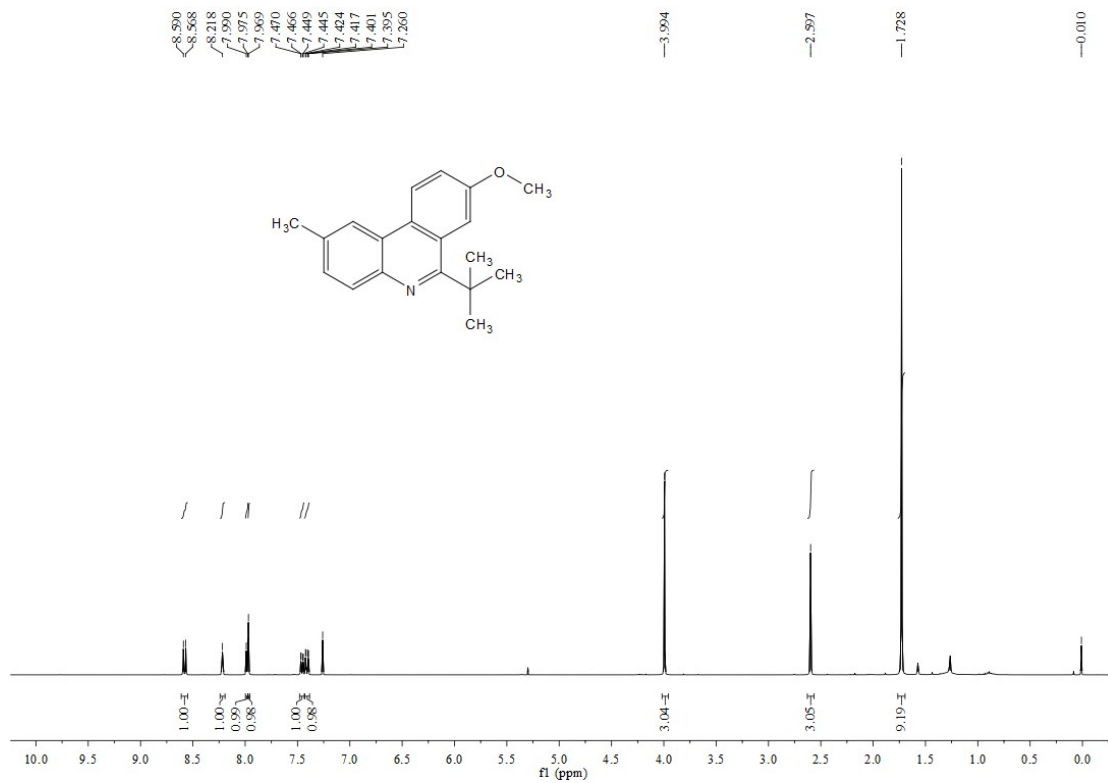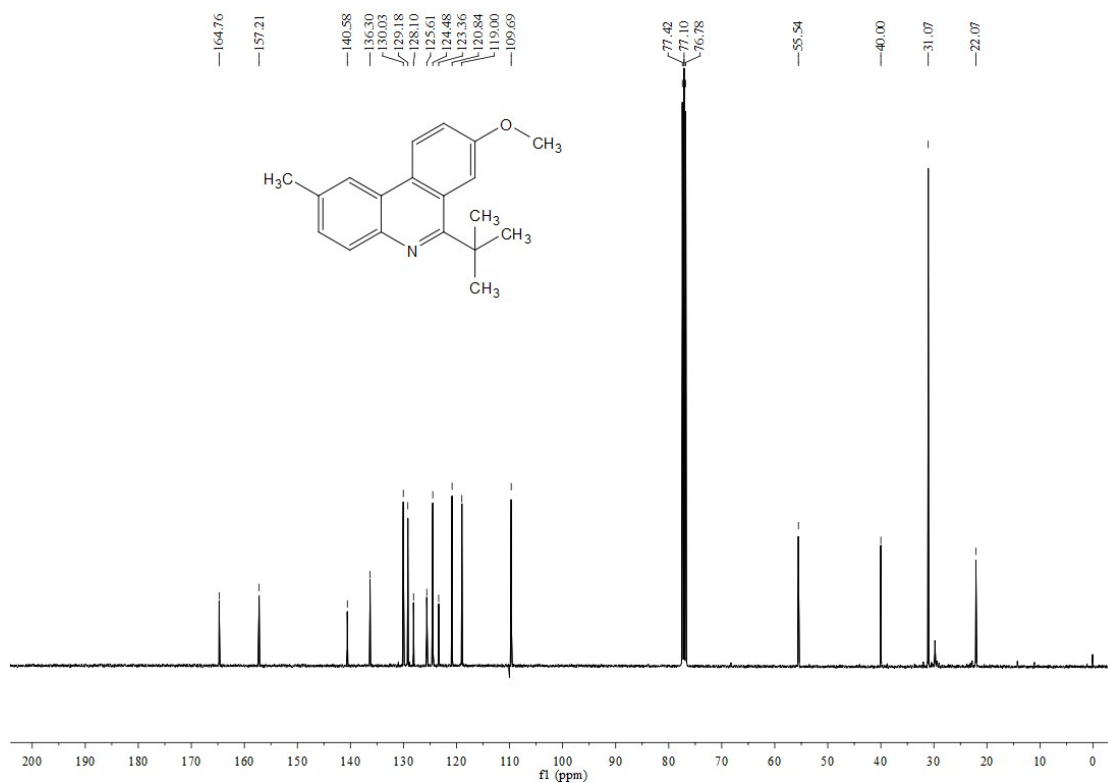

# 6-(*tert*-butyl)-8-methoxyphenanthridine (3d)

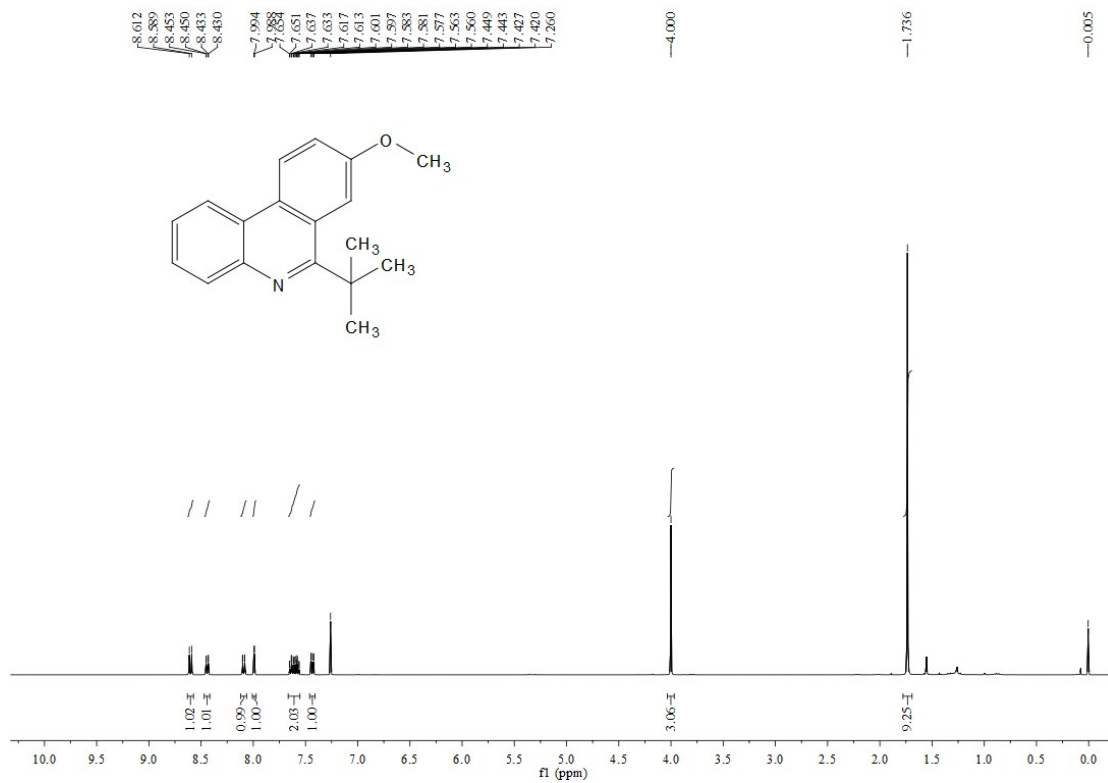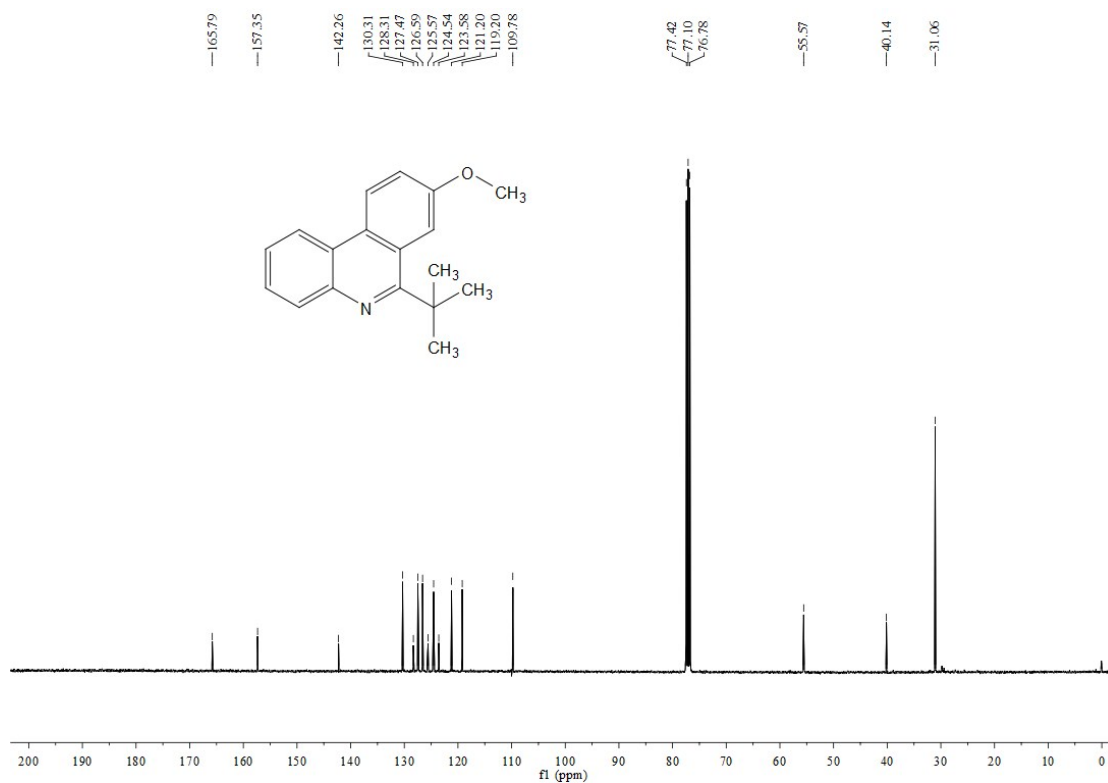

# 6-(*tert*-butyl)-2-fluorophenanthridine (3e)

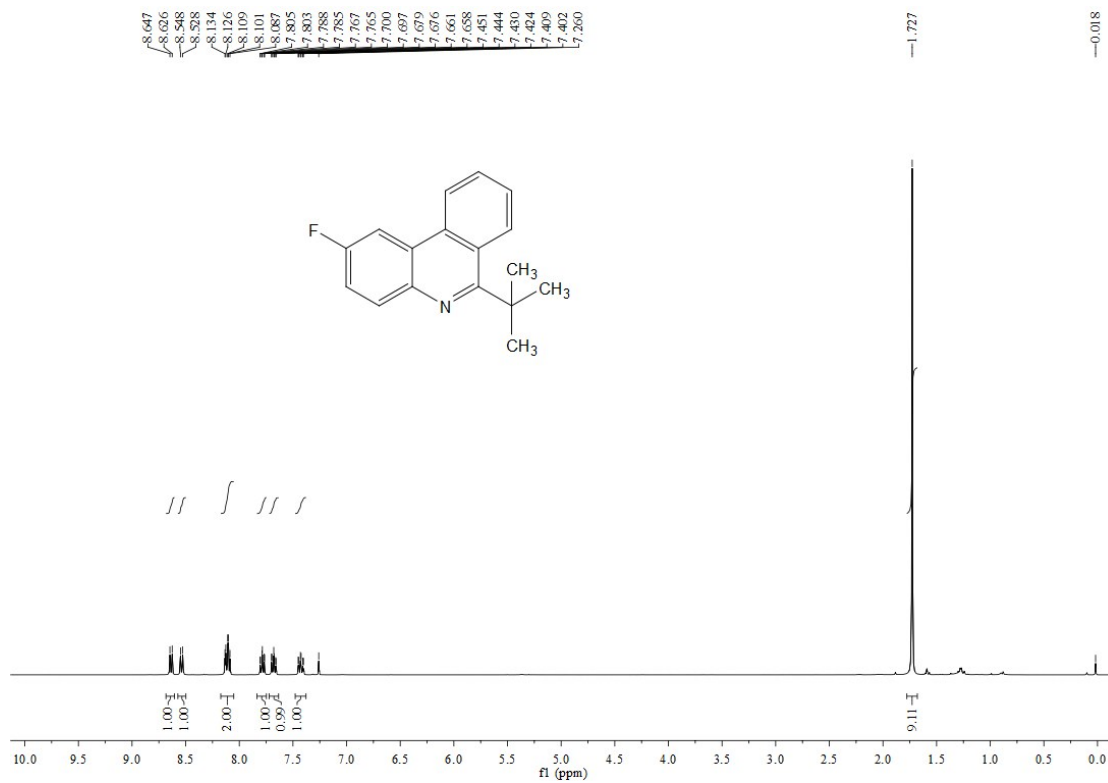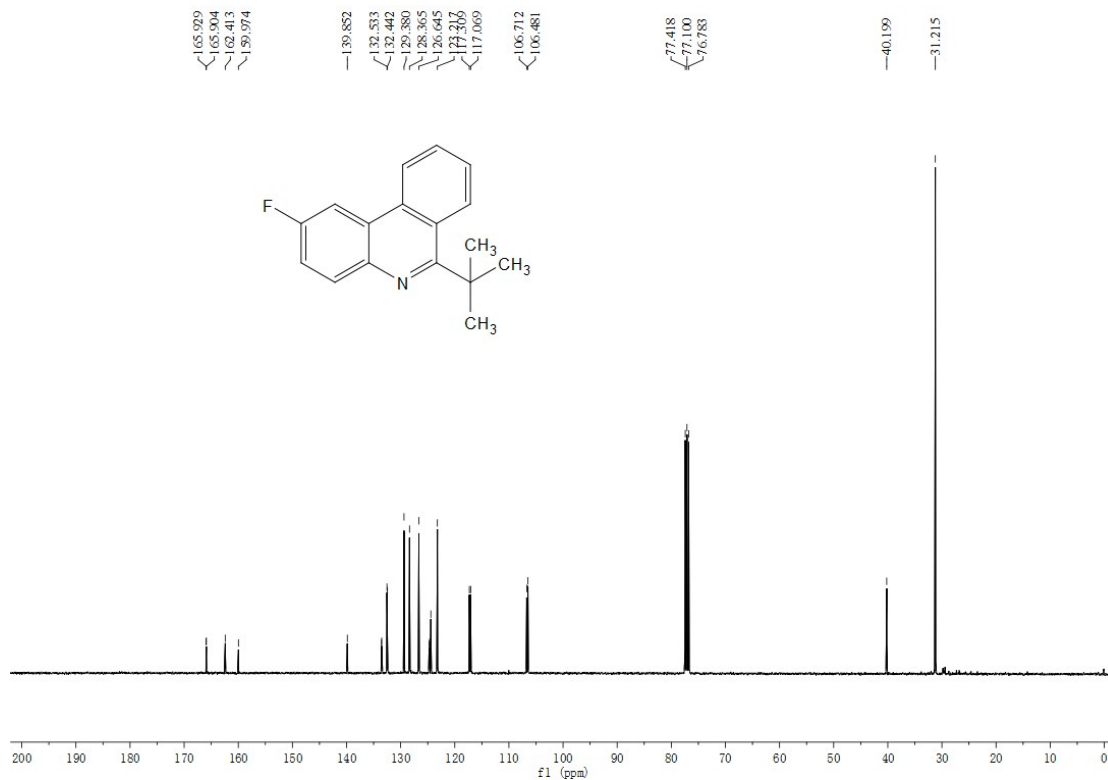

# 6-(*tert*-butyl)-8-fluoro-2-methylphenanthridine (3f)

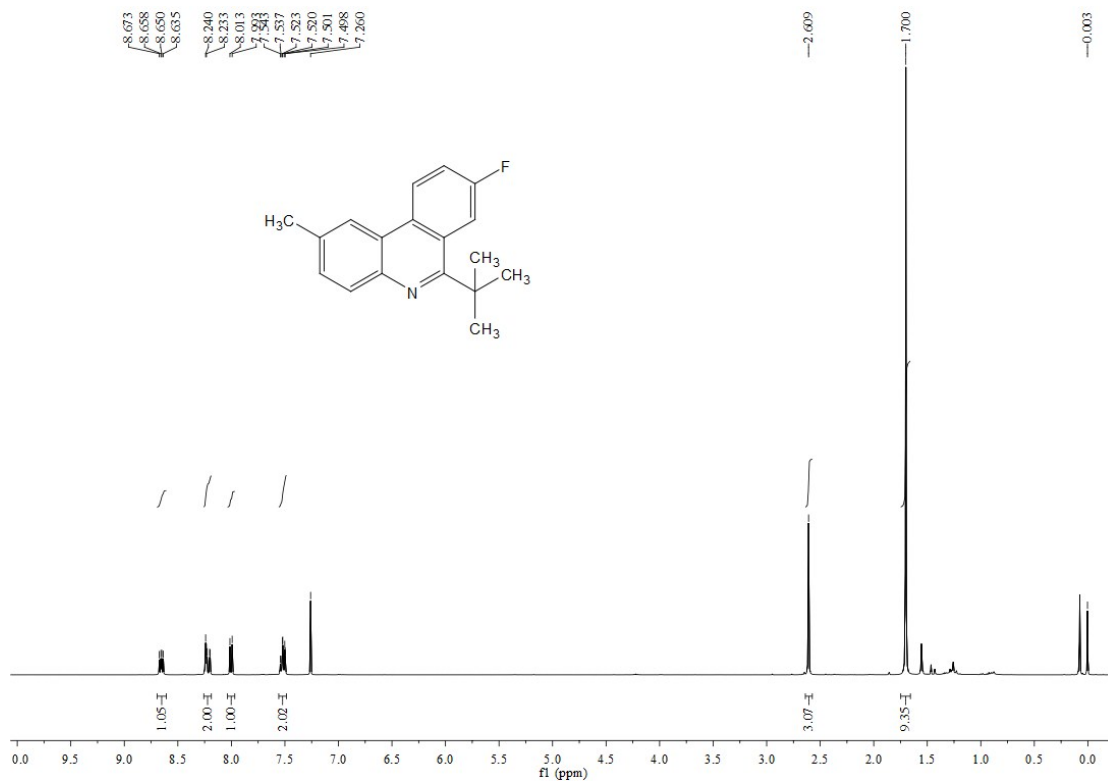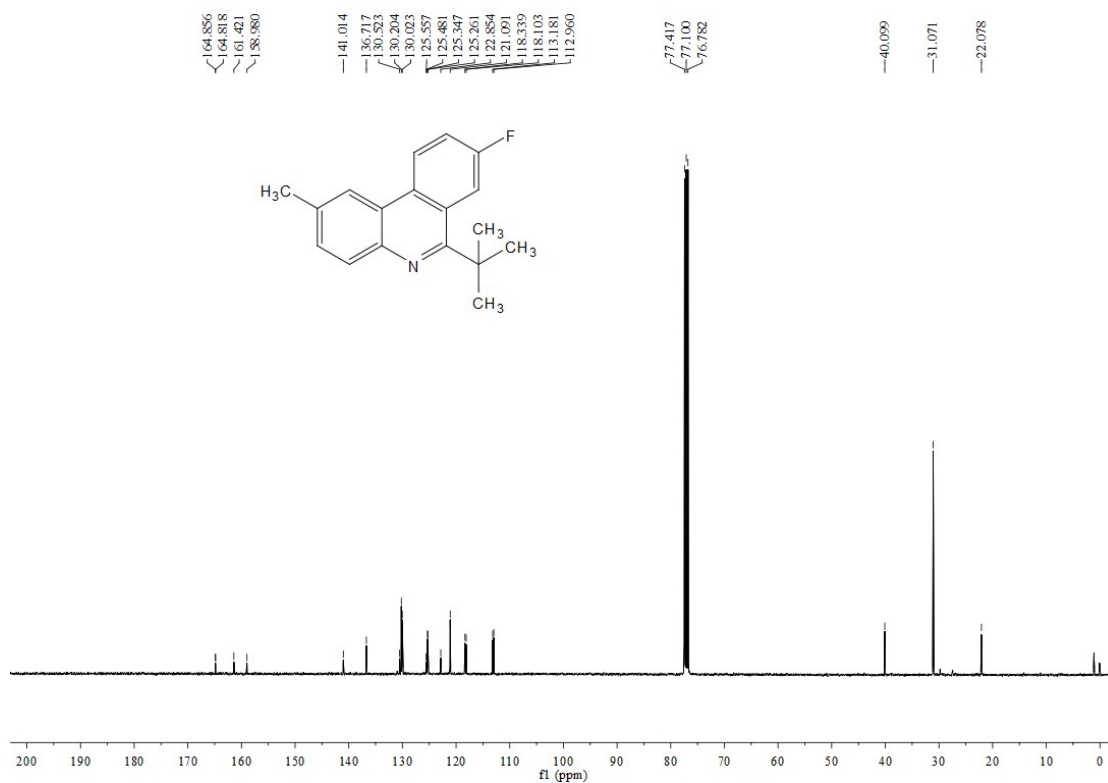

**6-(*tert*-butyl)-9-methoxyphenanthridine (3g) and 6-(*tert*-butyl)-7-methoxyphenanthridine (3h)**

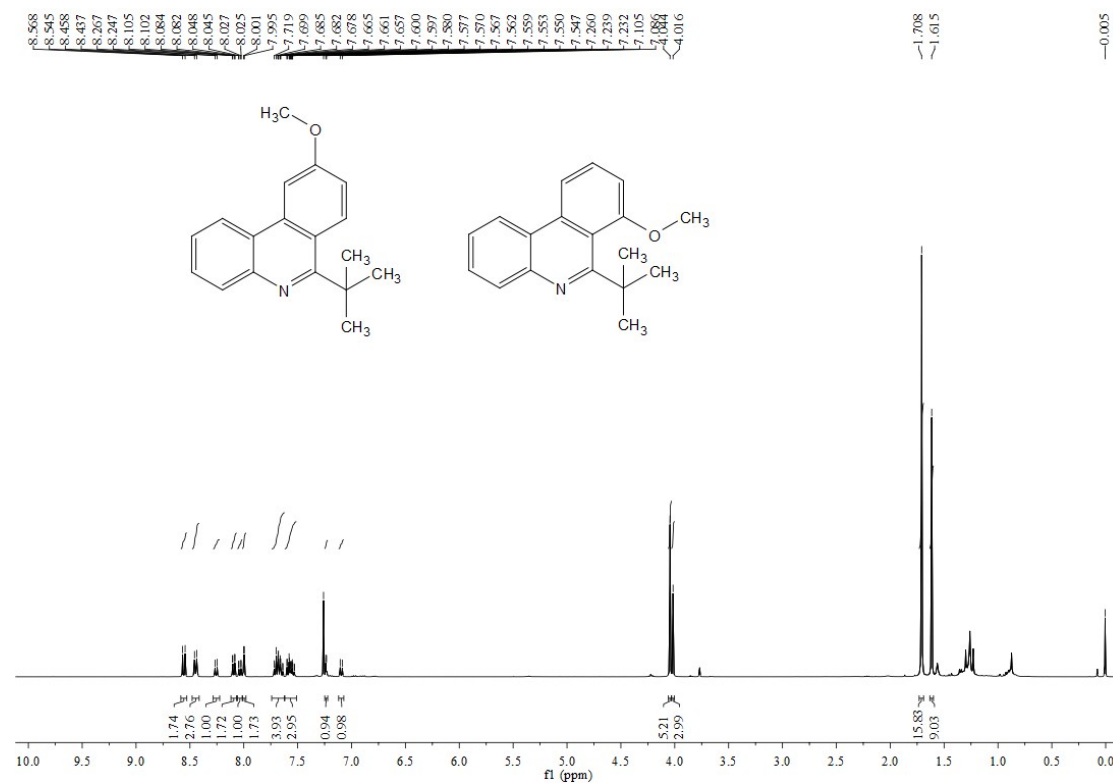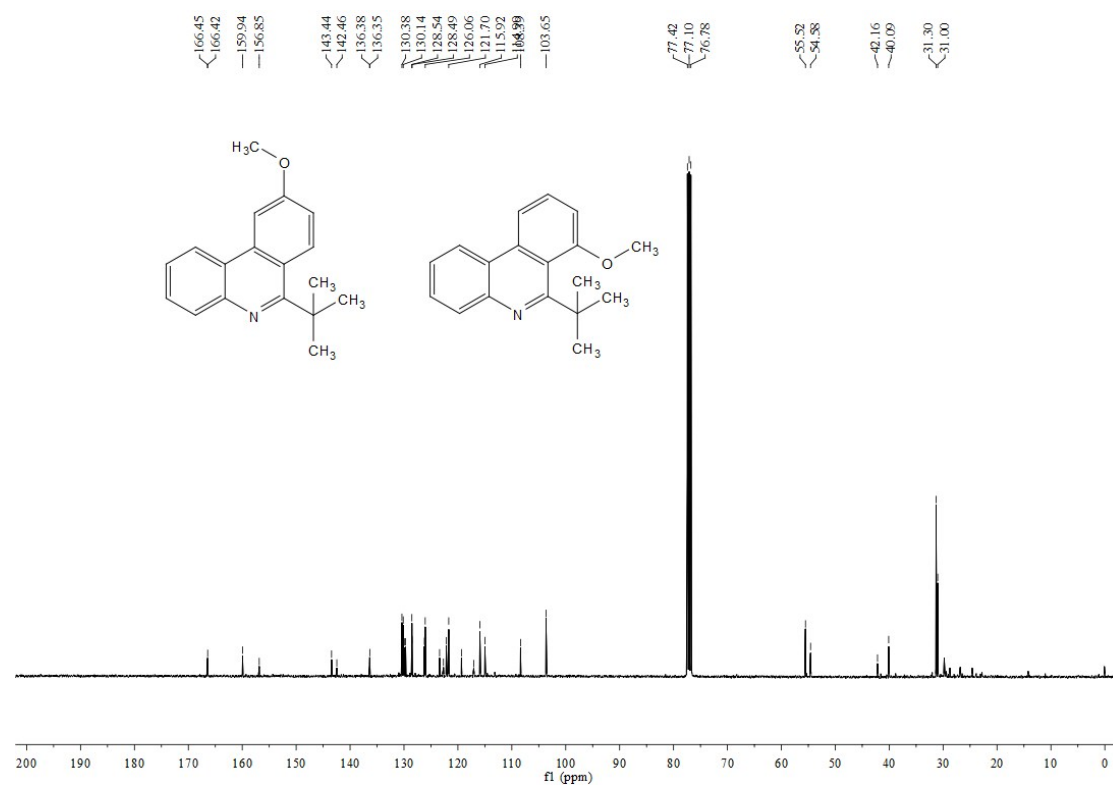



# 5-(*tert*-butyl)benzo[*c*][2,7]naphthyridine (3i)

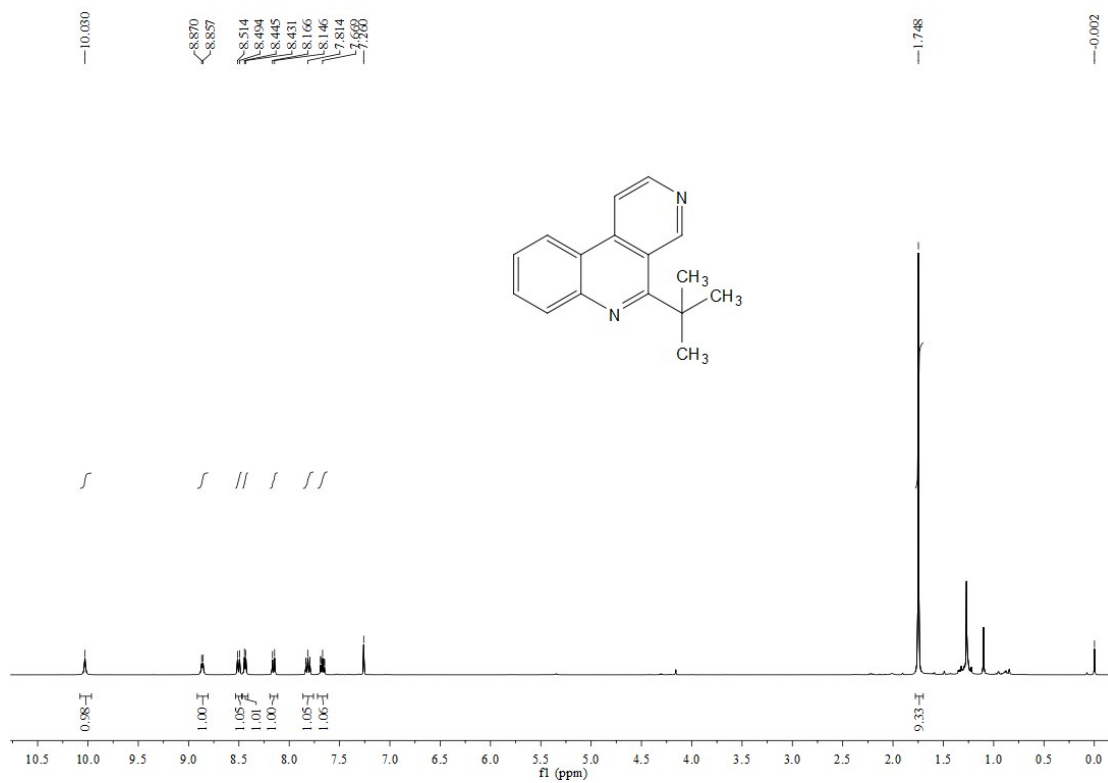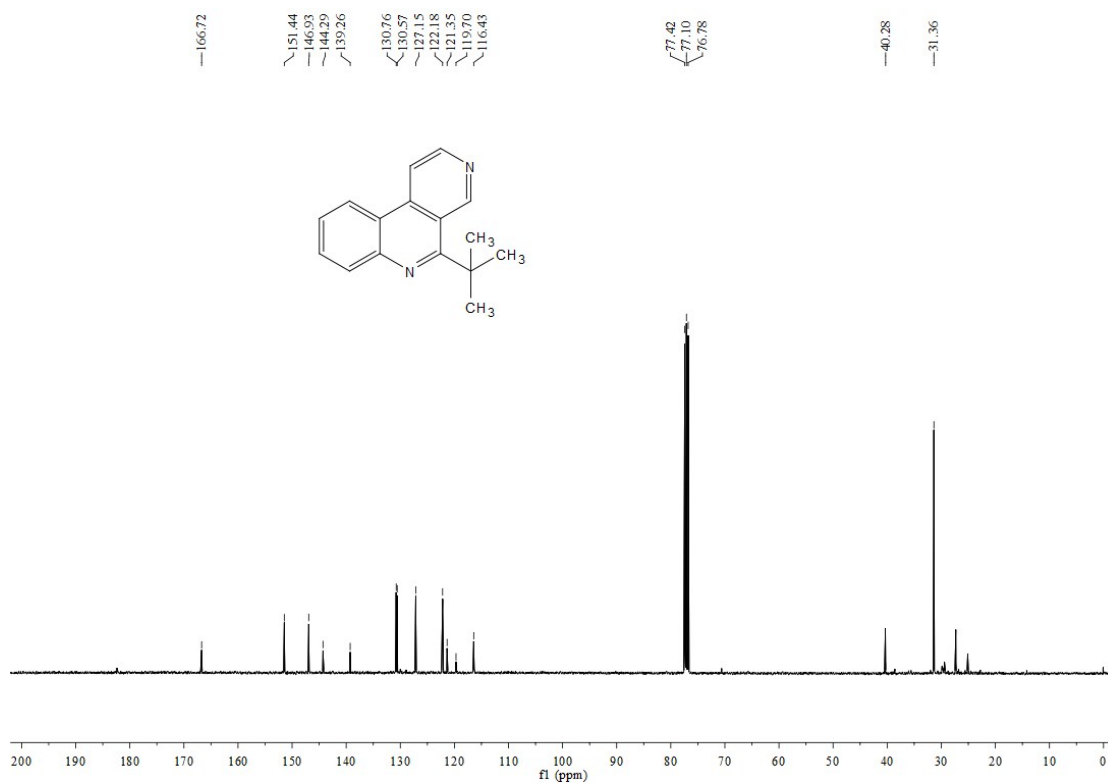

# 6-(*sec*-butyl)phenanthridine (3j)

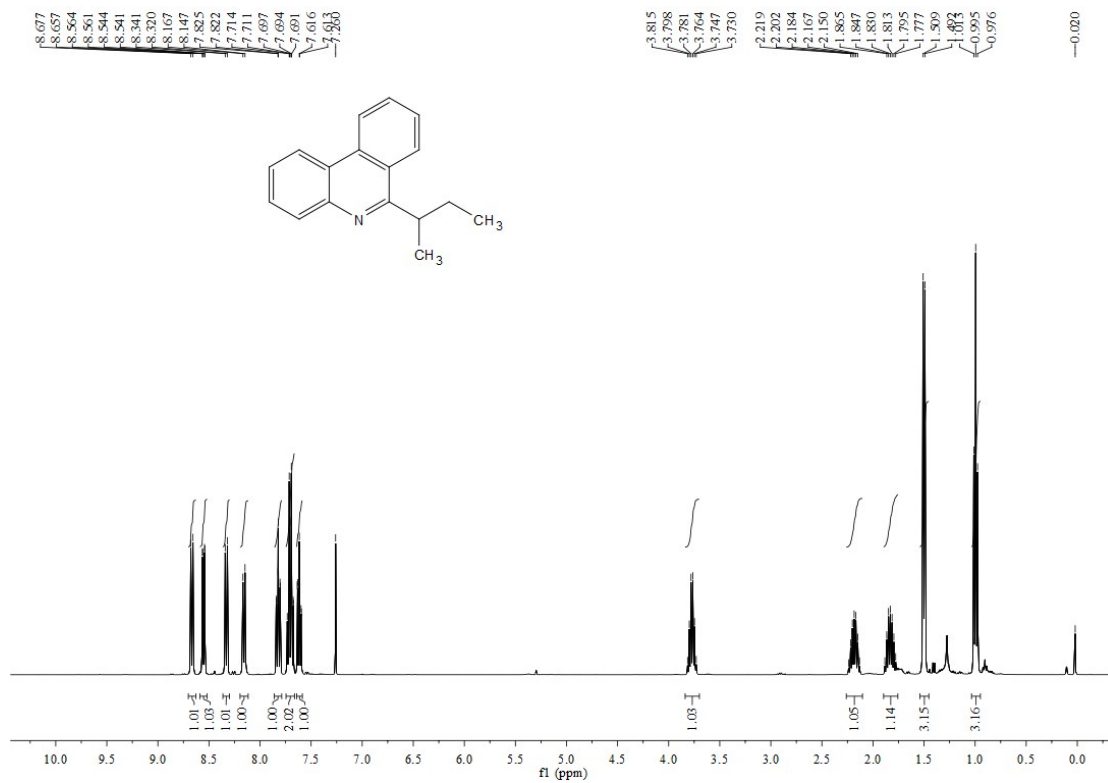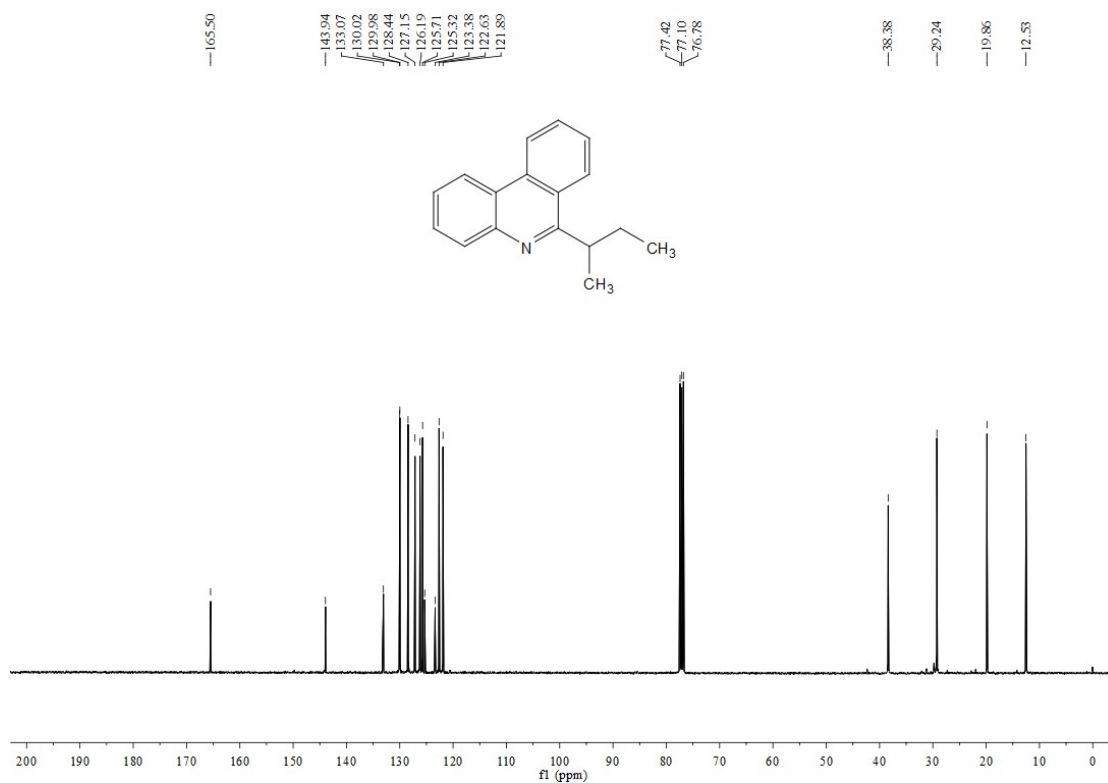

# 6-(*sec*-butyl)-8-methoxy-2-methylphenanthridine (3k)

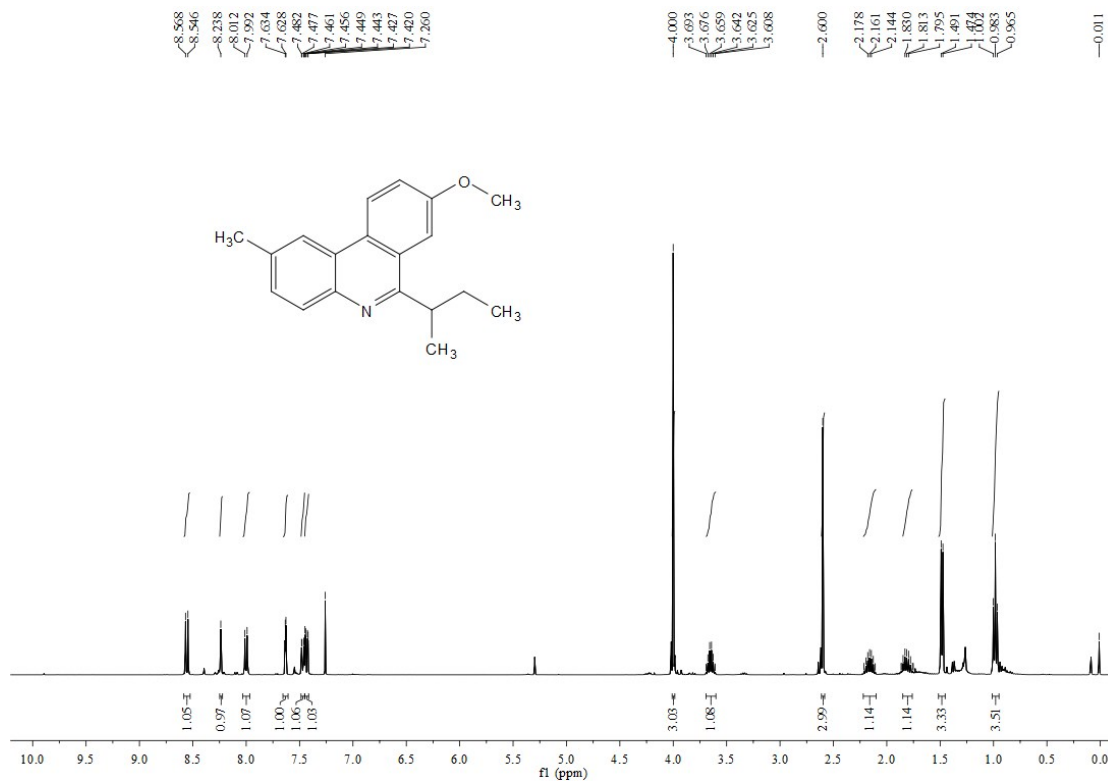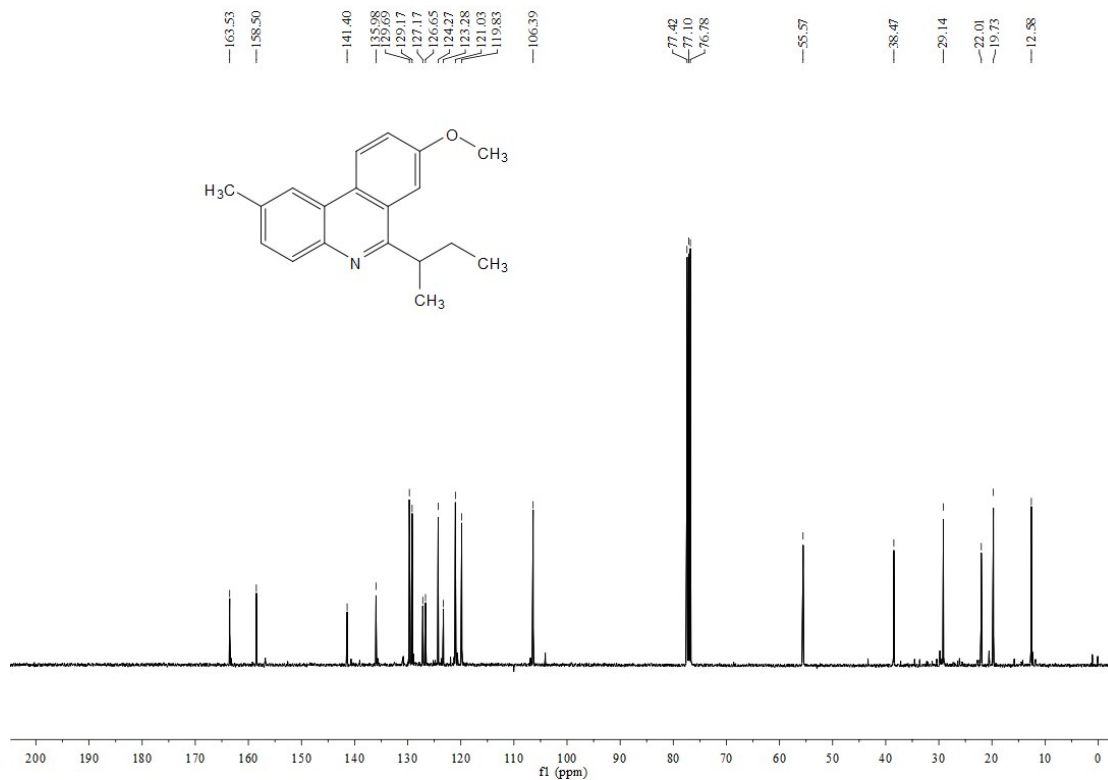

# 6-(*sec*-butyl)-8-fluoro-2-methylphenanthridine (31)

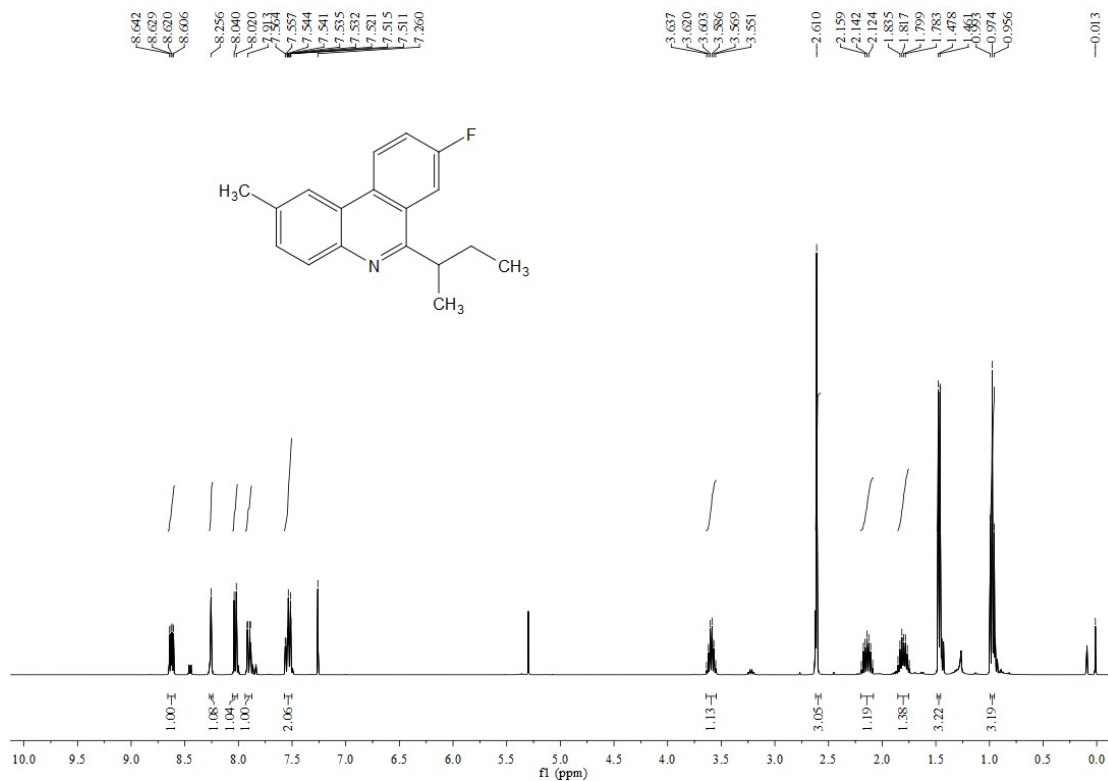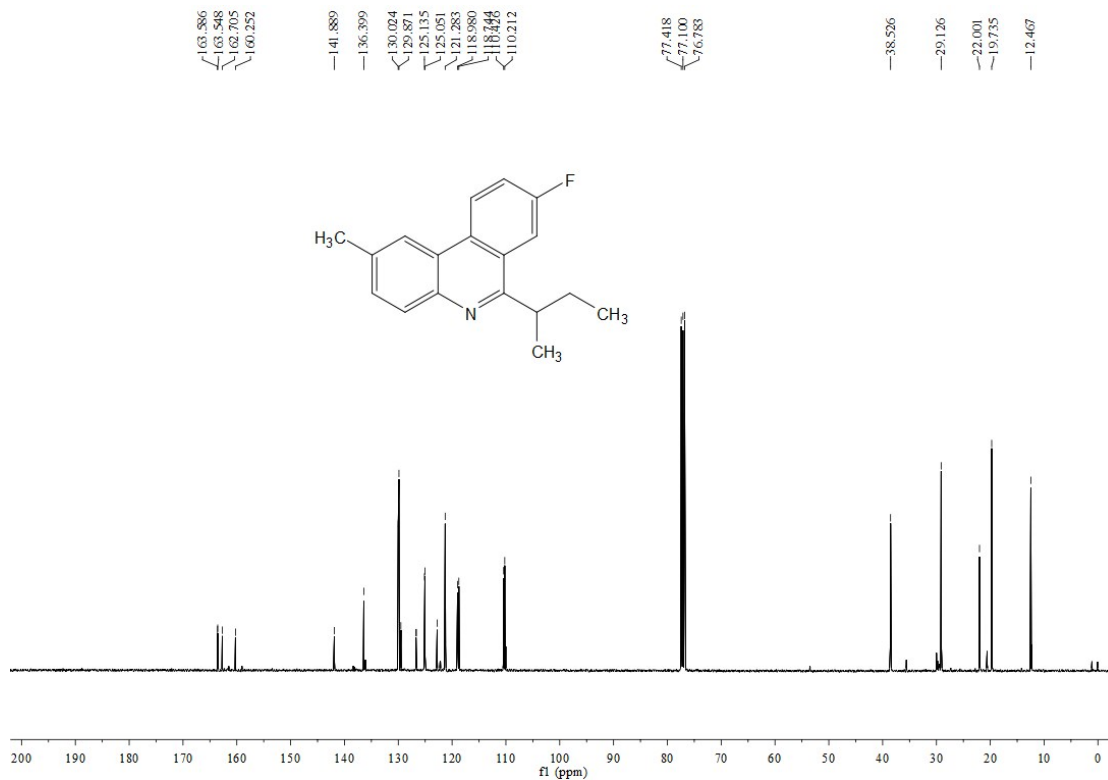

# 6-(*sec*-butyl)-2-fluorophenanthridine (3m)

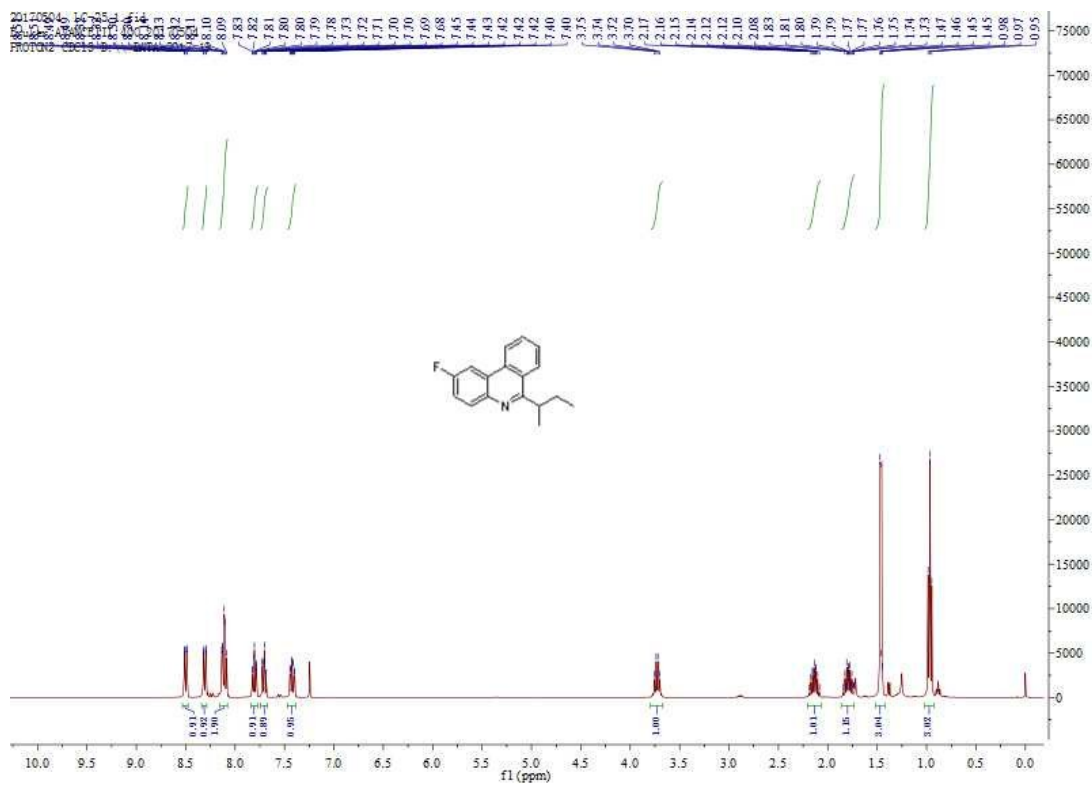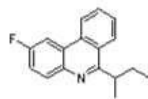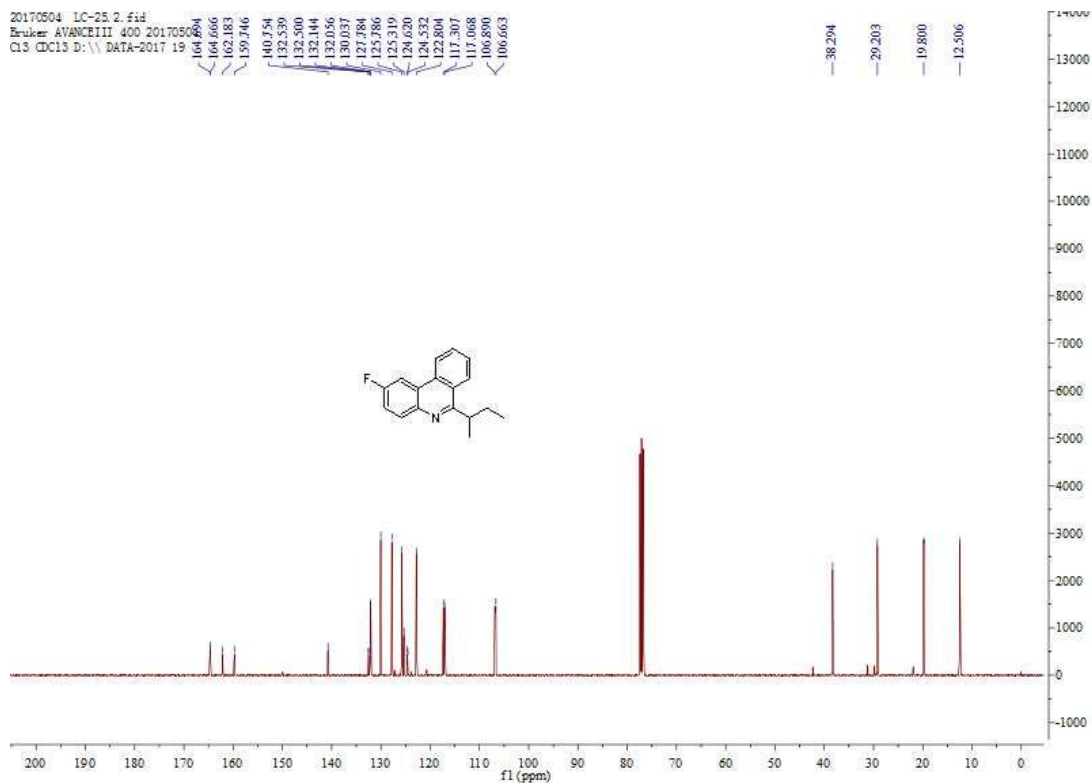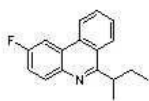

# 6-isopropylphenanthridine (3n)

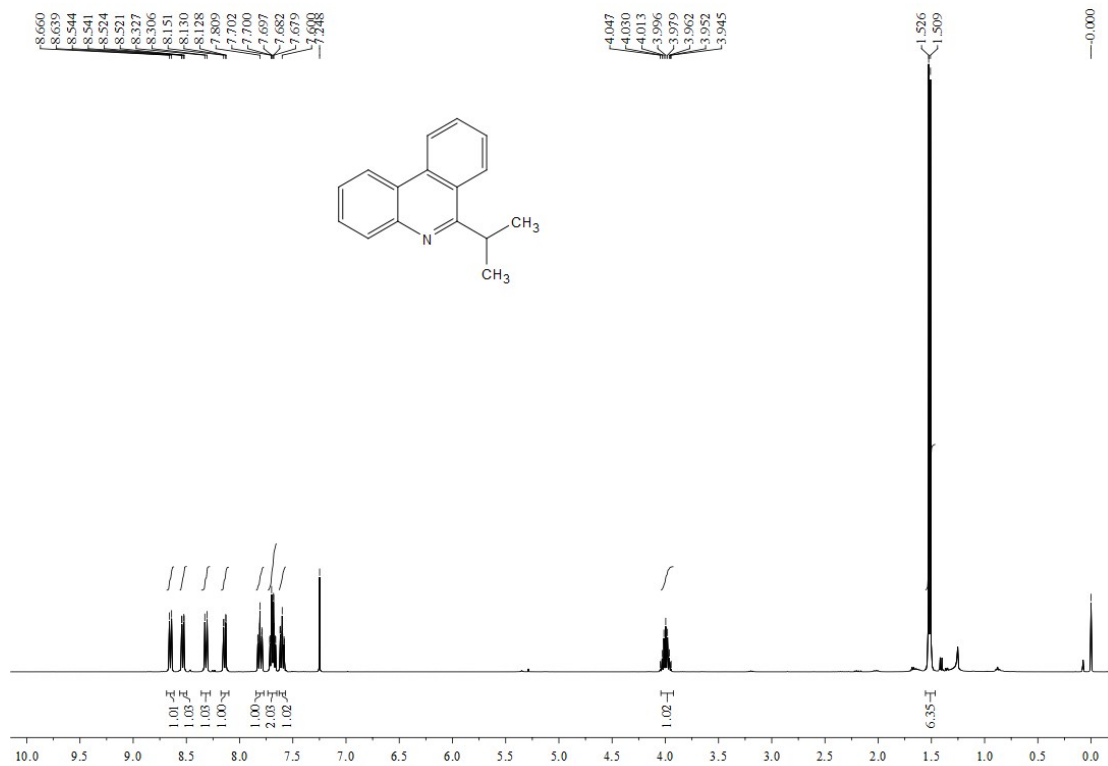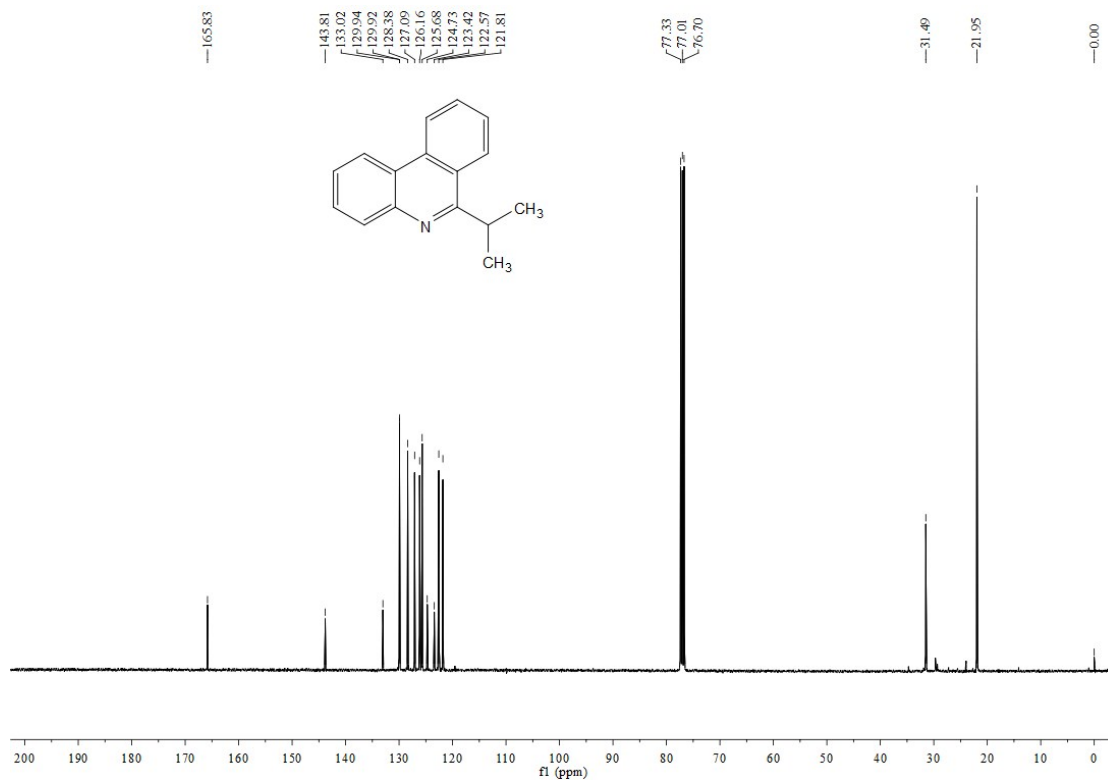

## 6-cyclohexylphenanthridine (3o)

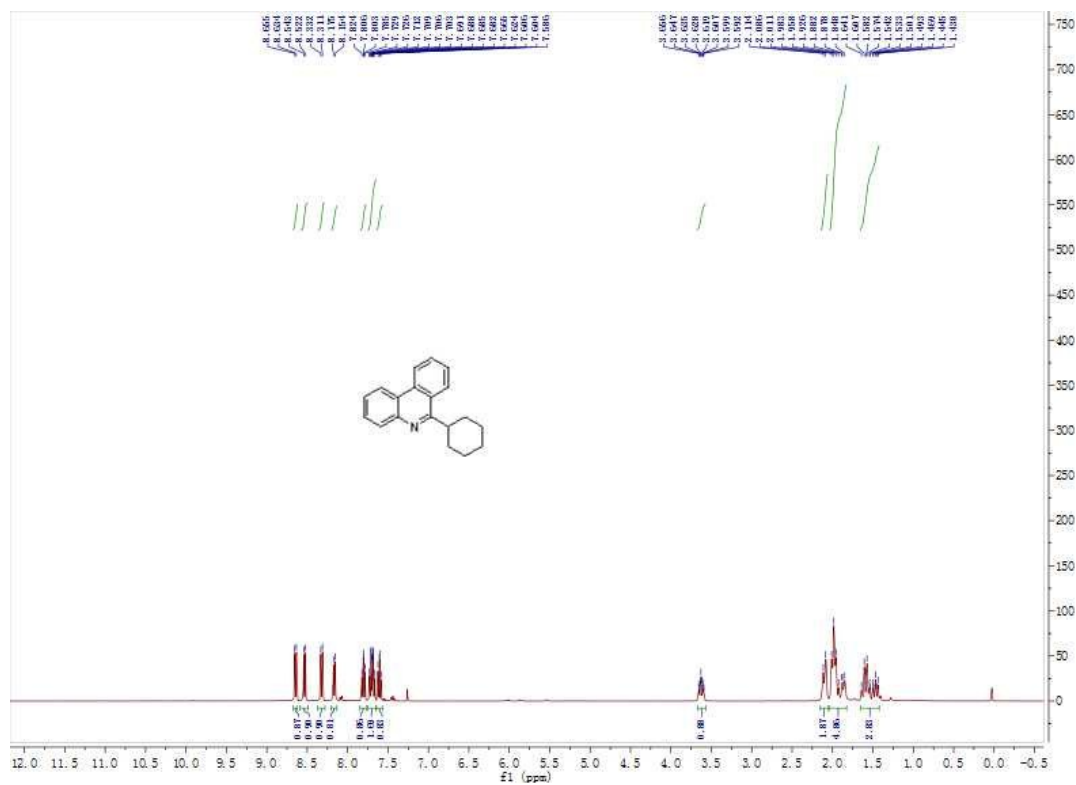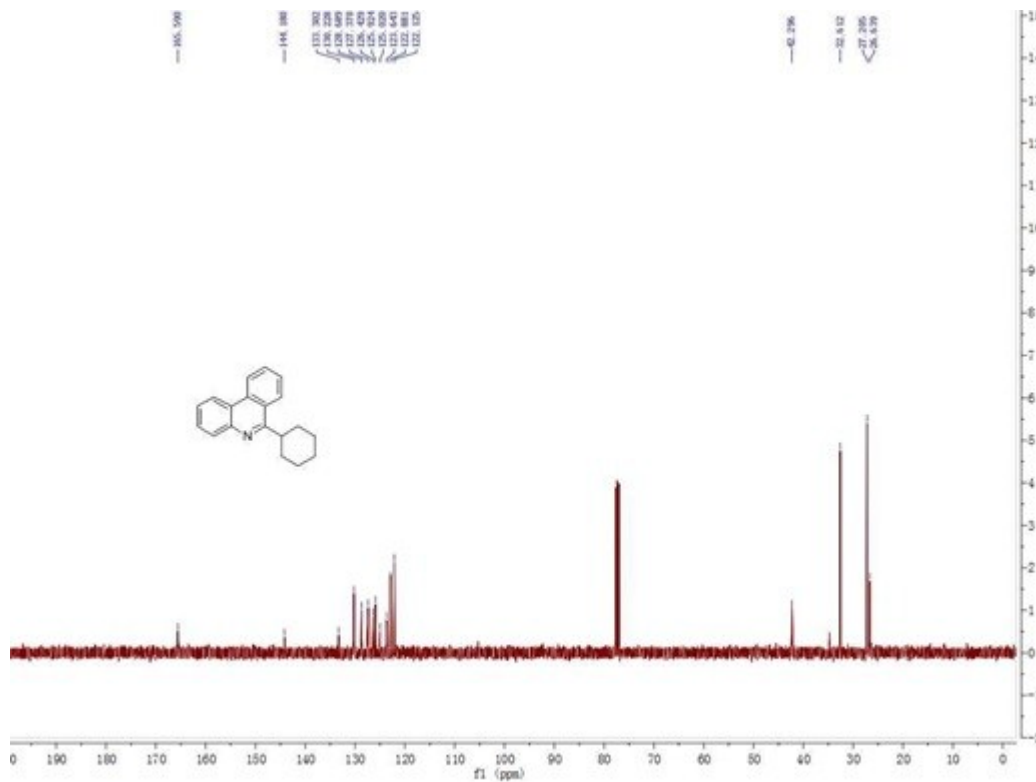

# 1-(phenanthridin-6-yl)ethan-1-one (3p)

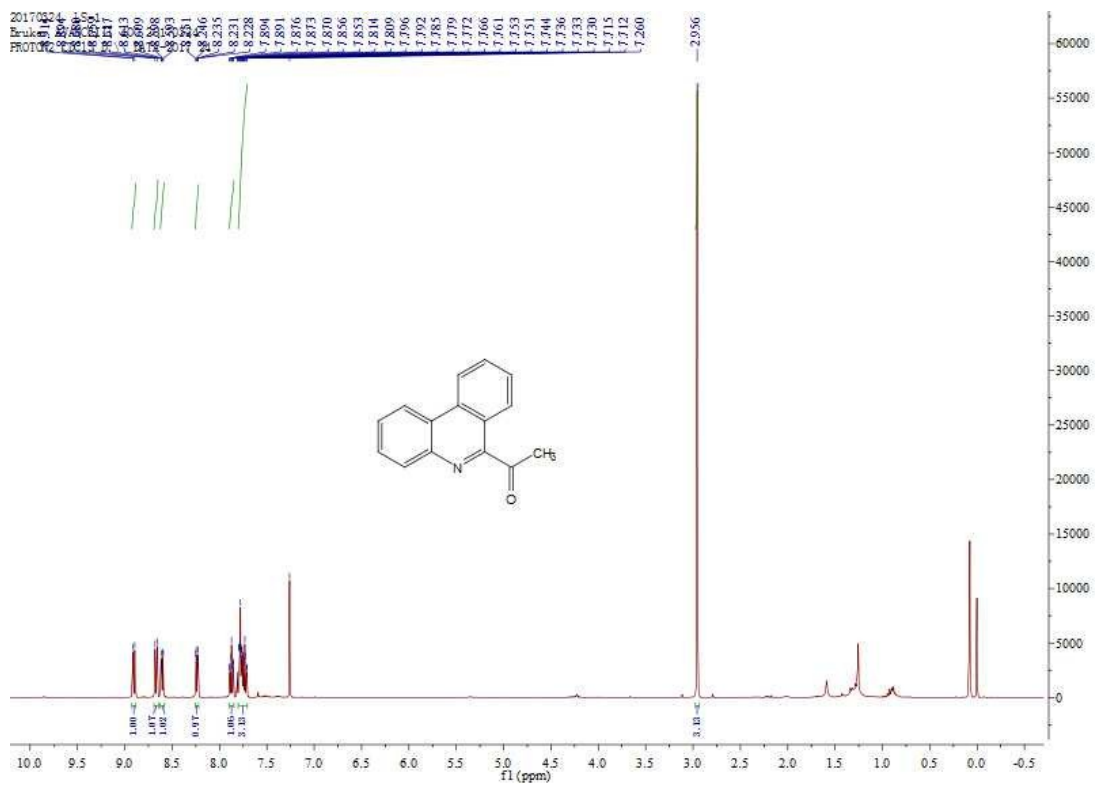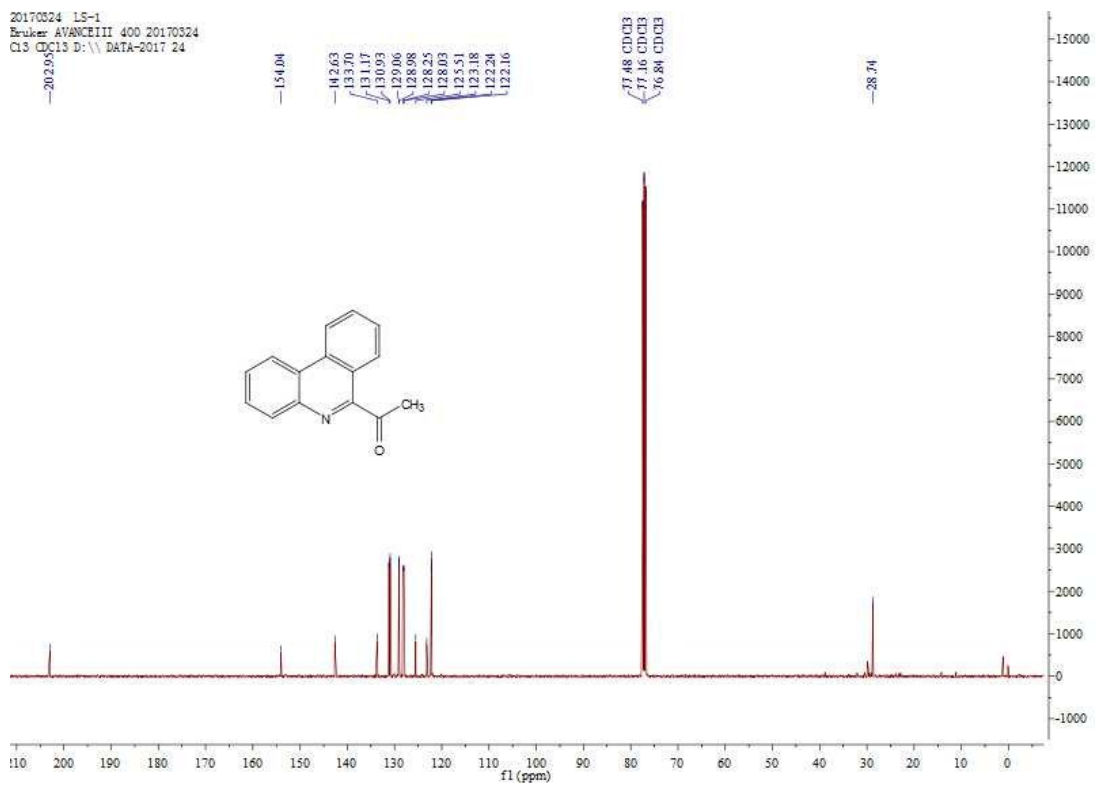



### 3-methyl-1-(phenanthridin-6-yl)butan-1-one (3q)

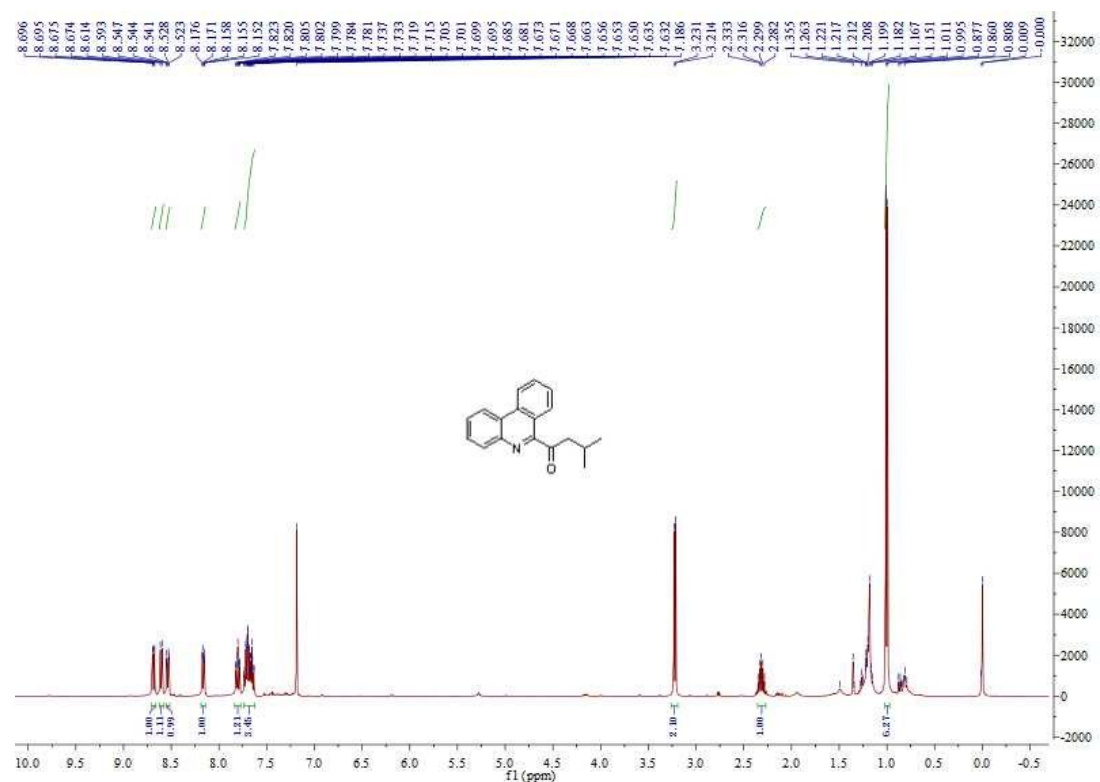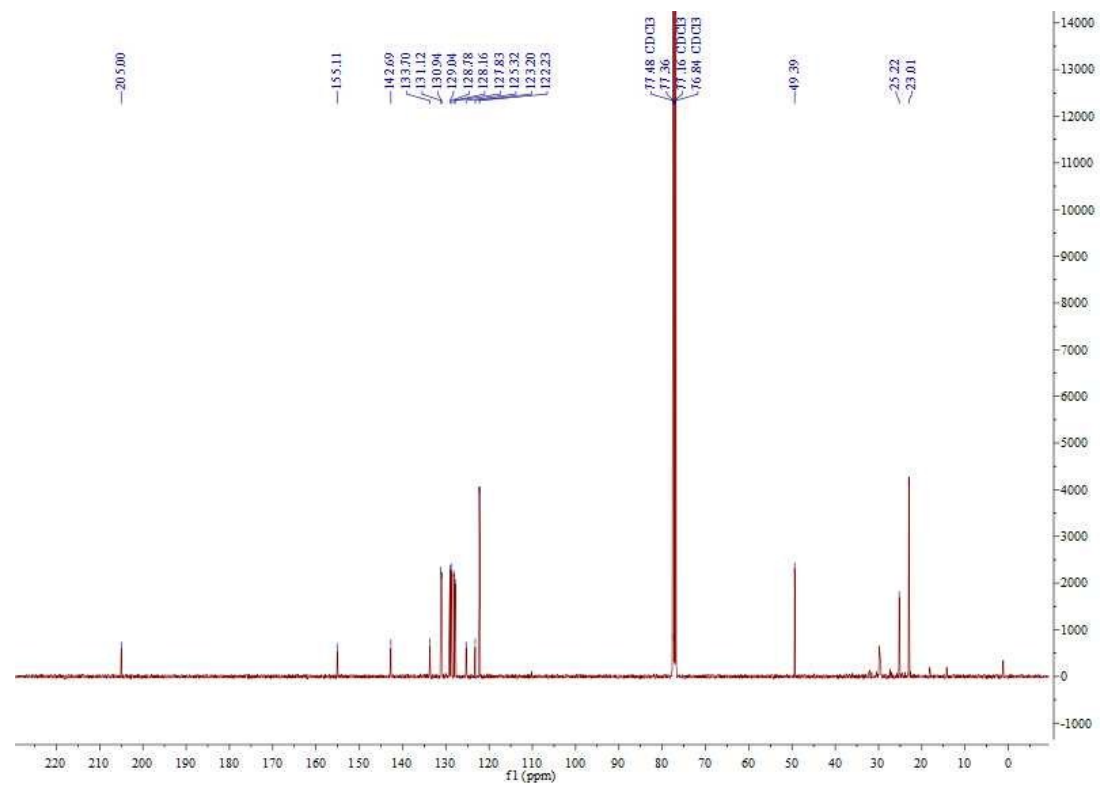

# 1-(phenanthridin-6-yl)-3-phenylpropan-1-one (3r)

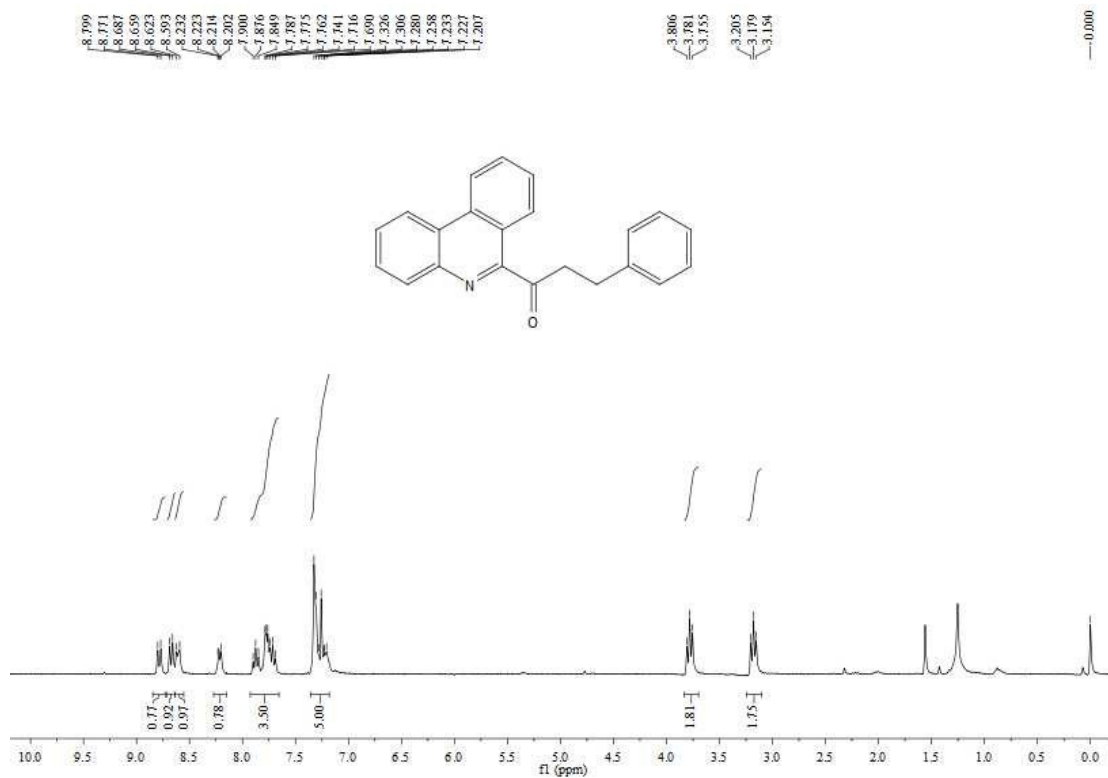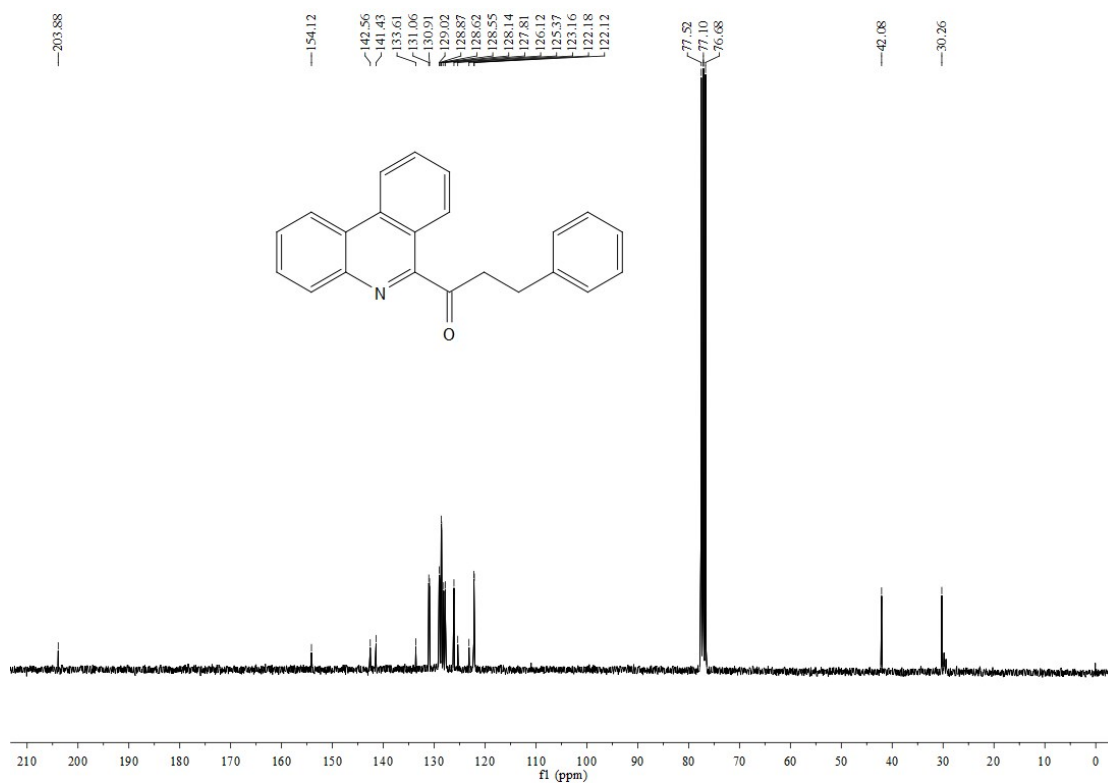

### 3-methyl-1-(2-methylphenanthridin-6-yl)butan-1-one (3s)

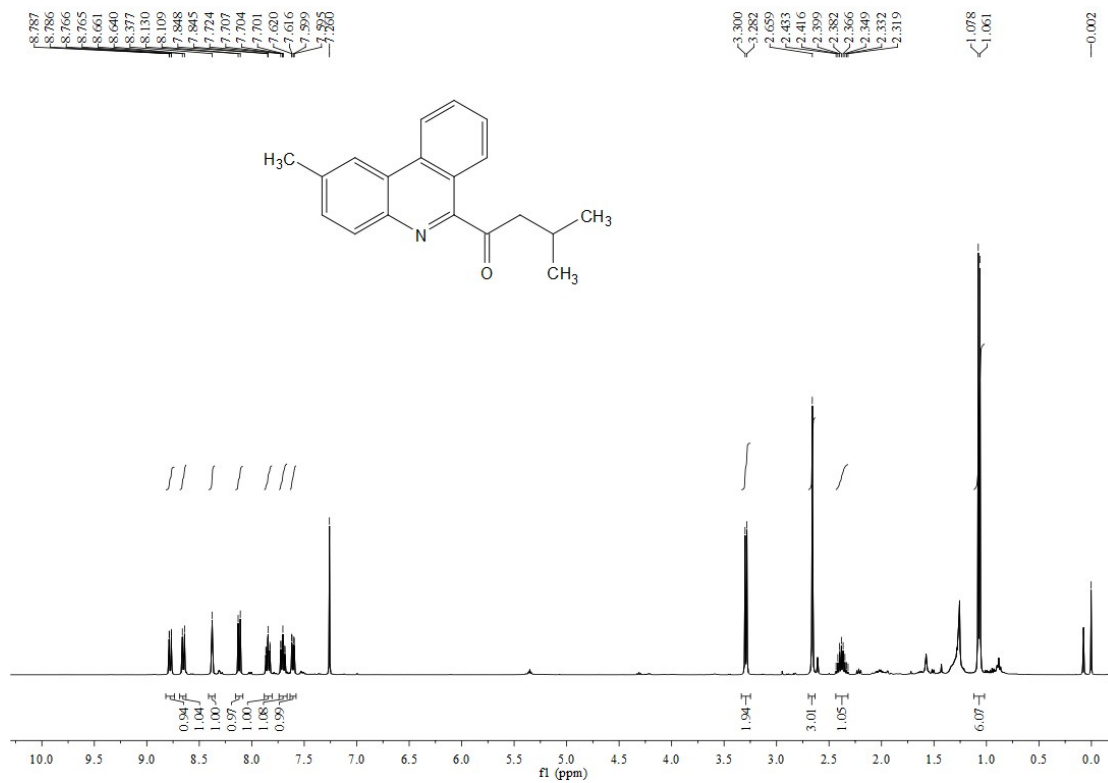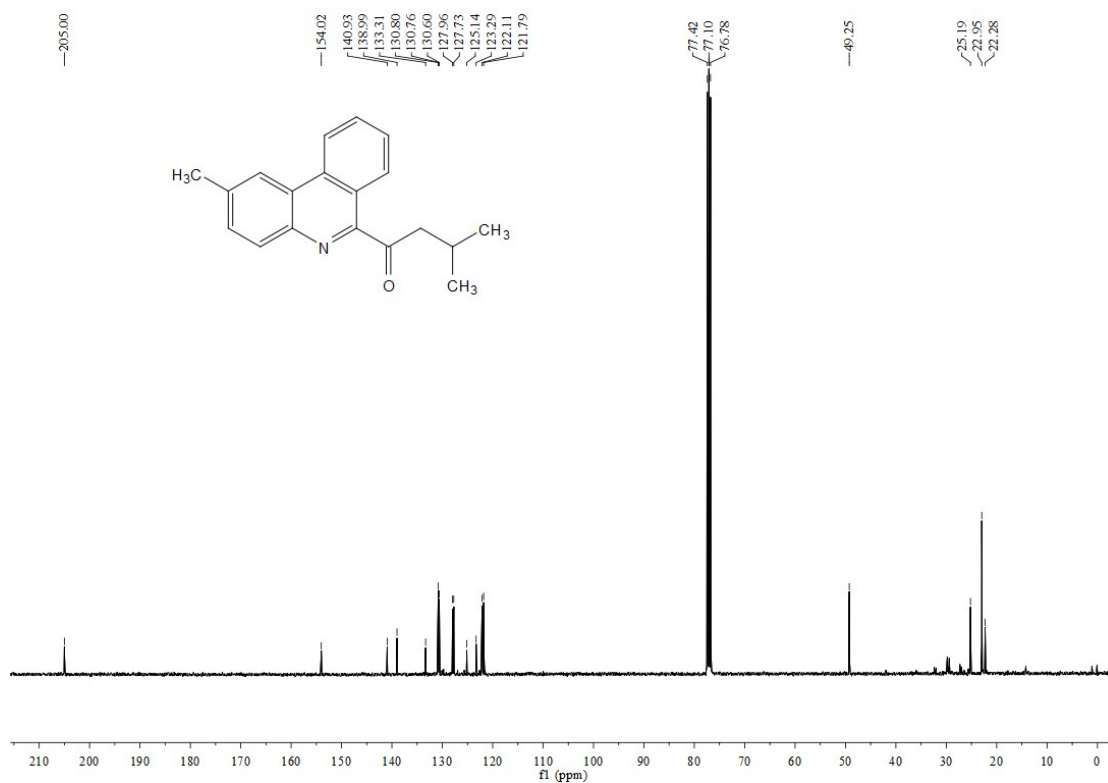

# 1-(8-fluoro-2-methylphenanthridin-6-yl)ethan-1-one (3t)

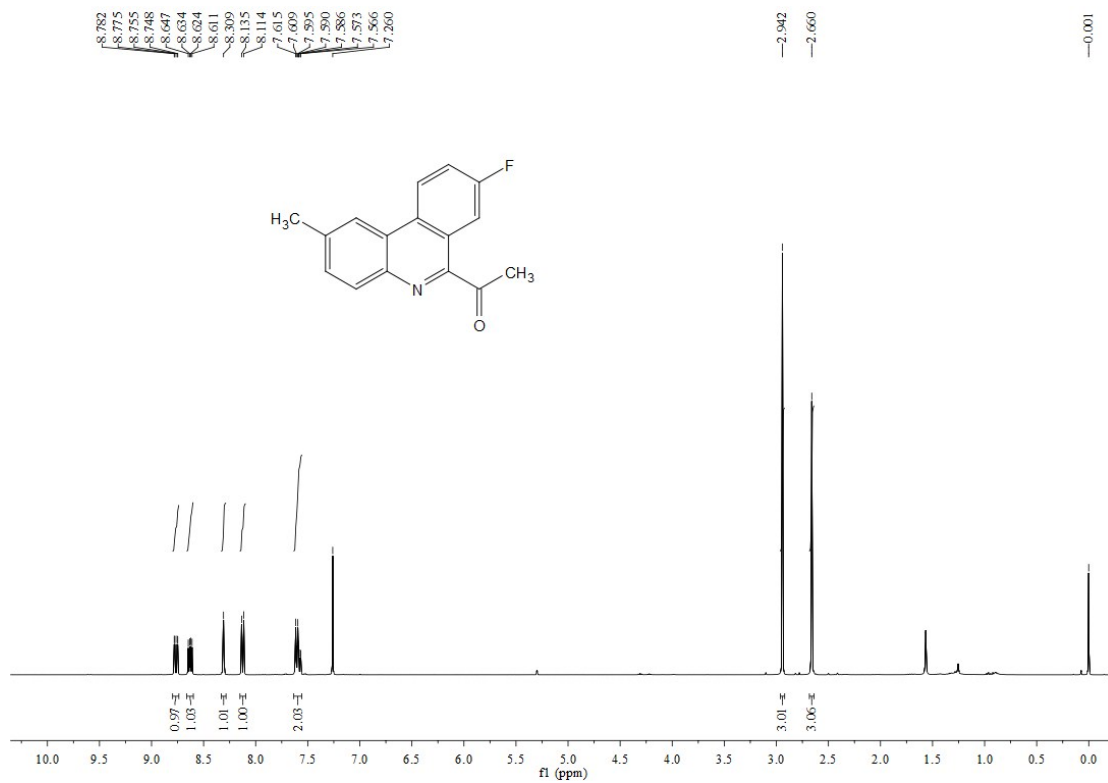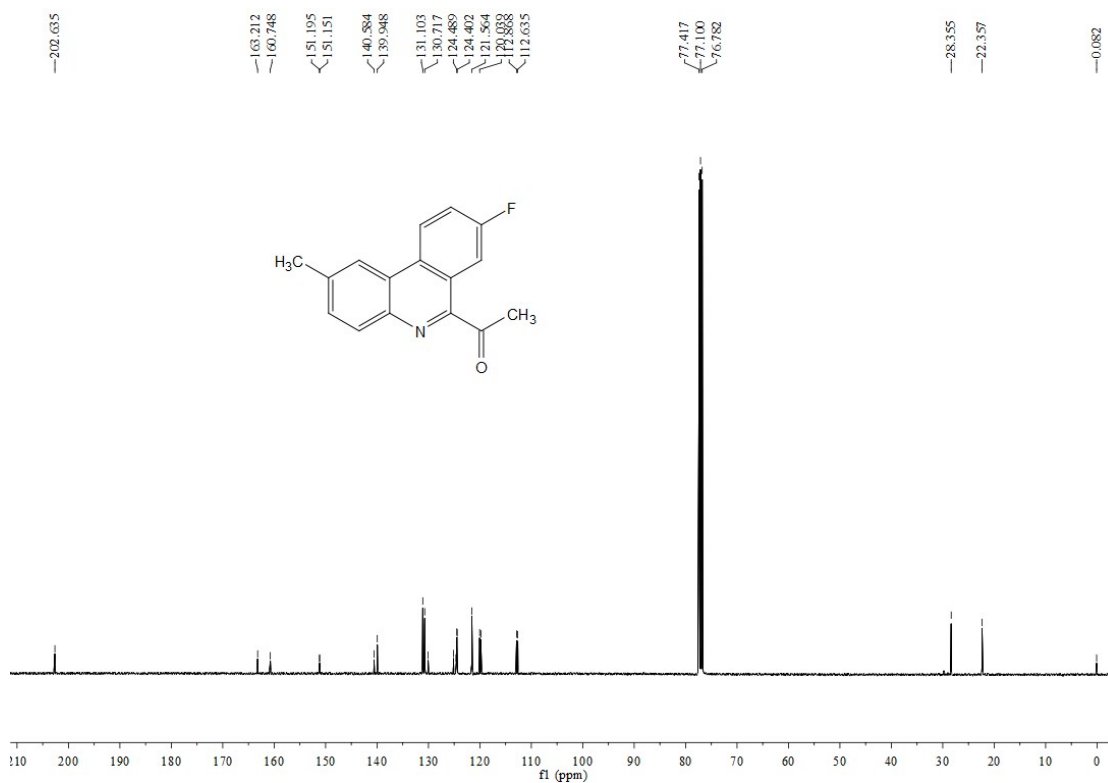

# 1-(8-methoxy-2-methylphenanthridin-6-yl)-3-methylbutan-1-one (3u)

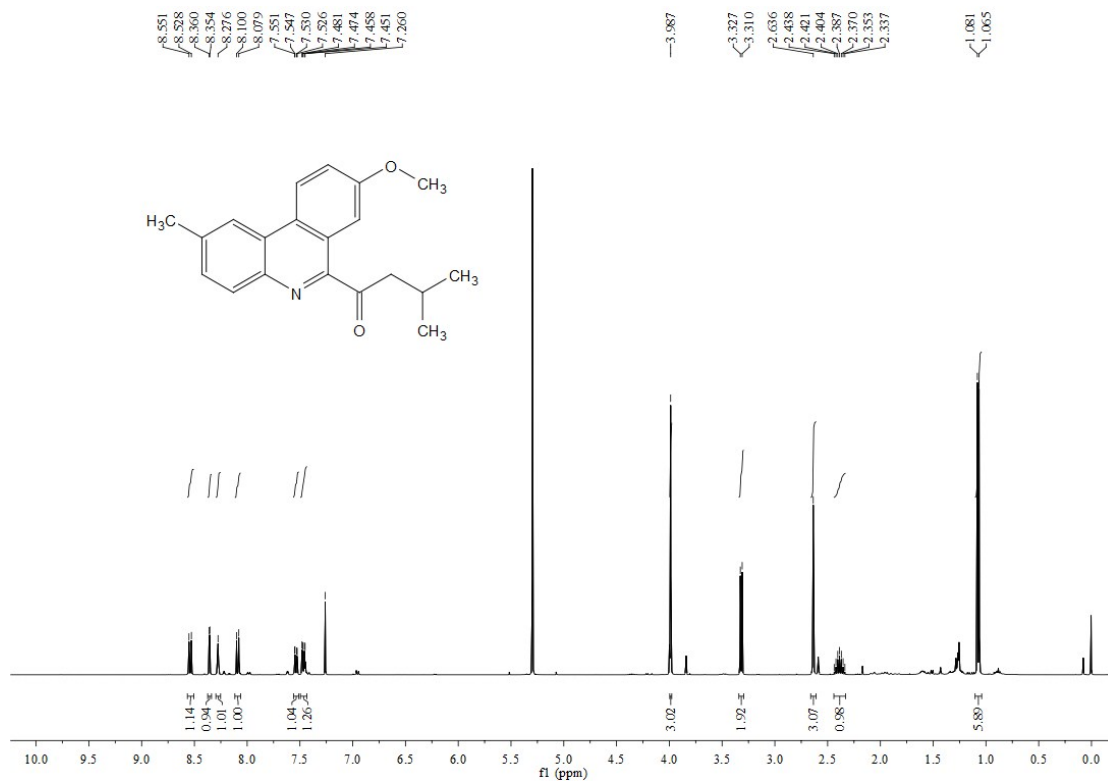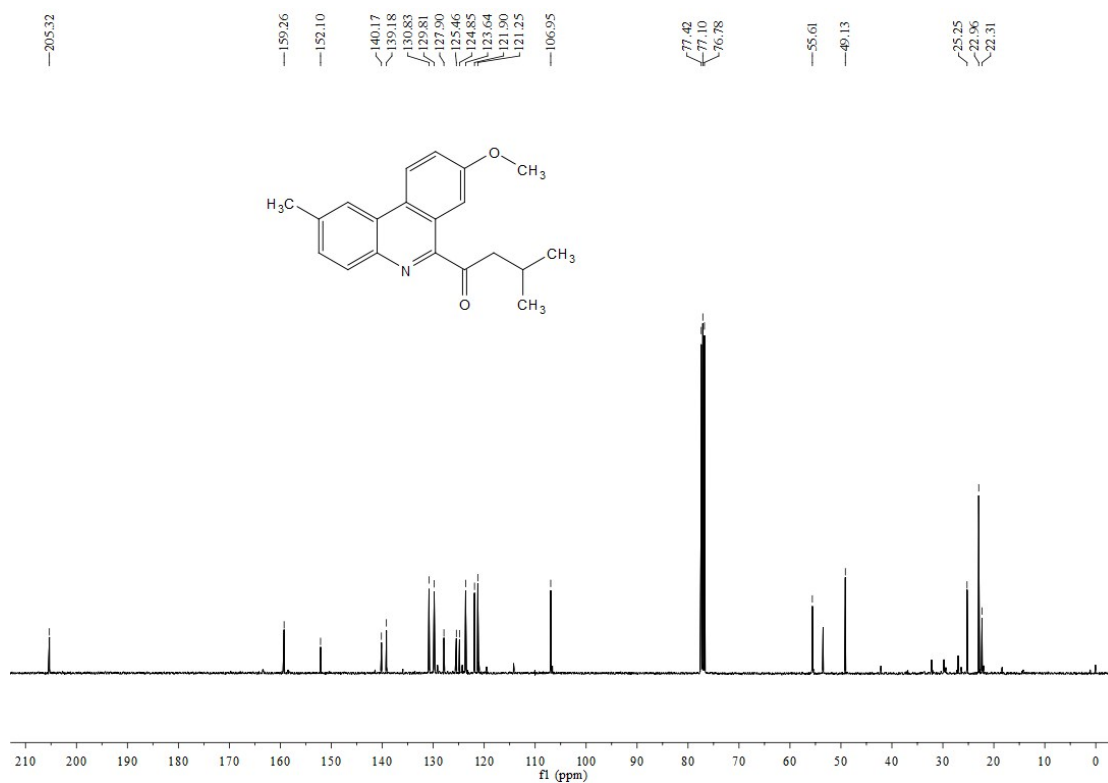

# 1-(2-fluorophenanthridin-6-yl)-3-methylbutan-1-one (3v)

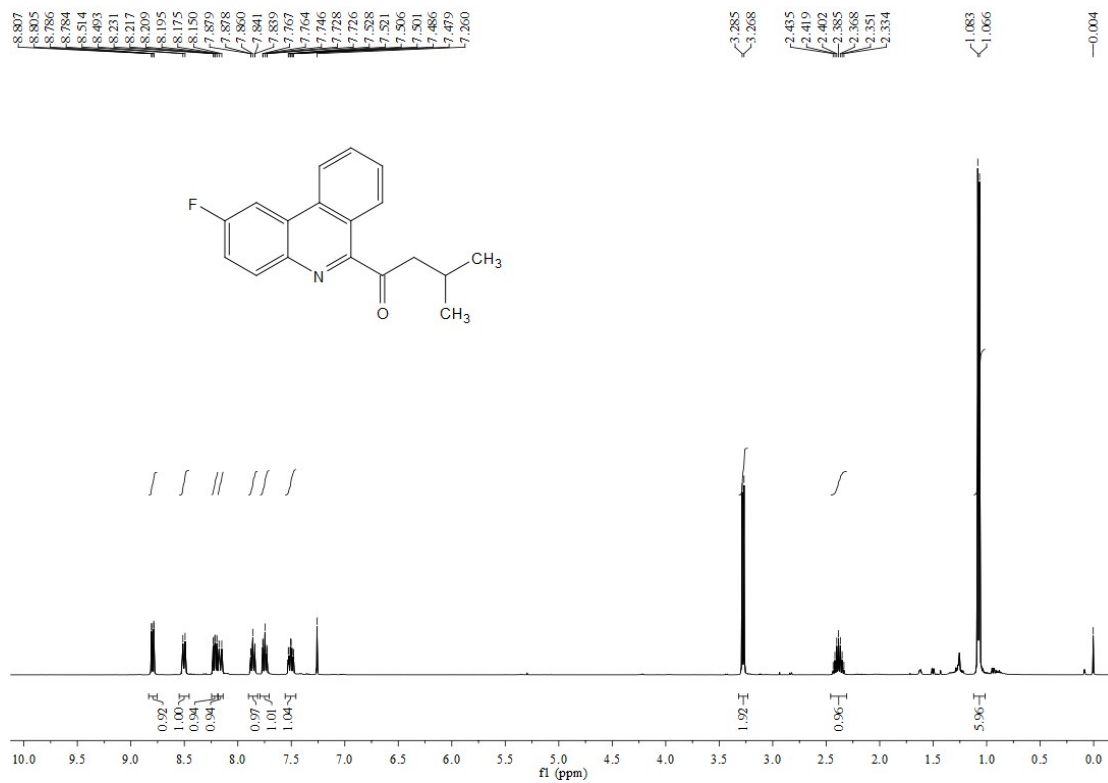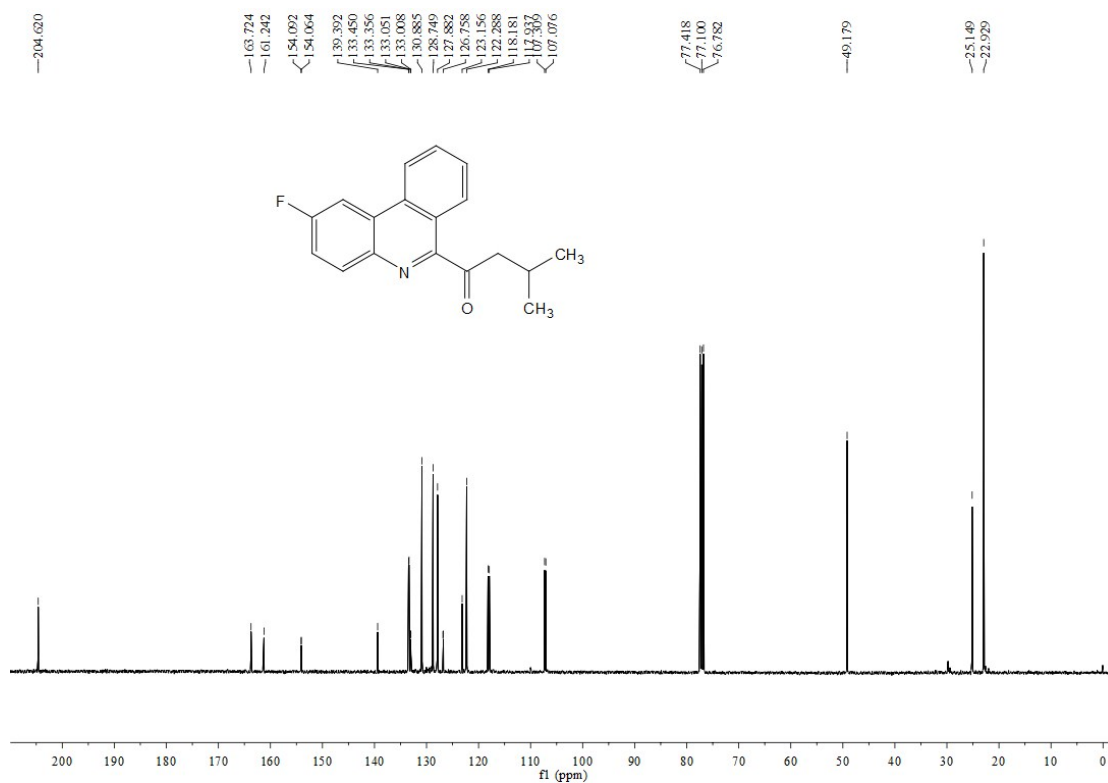

# 1-(8-fluoro-2-methylphenanthridin-6-yl)-3-methylbutan-1-one (3w)

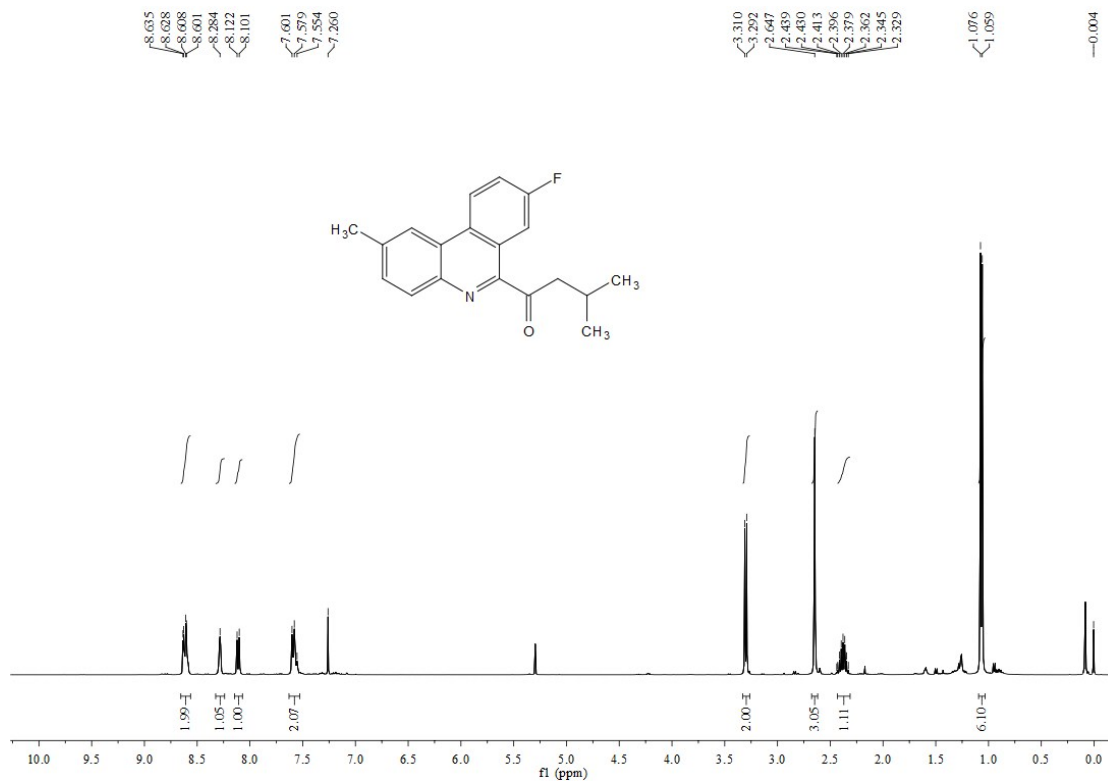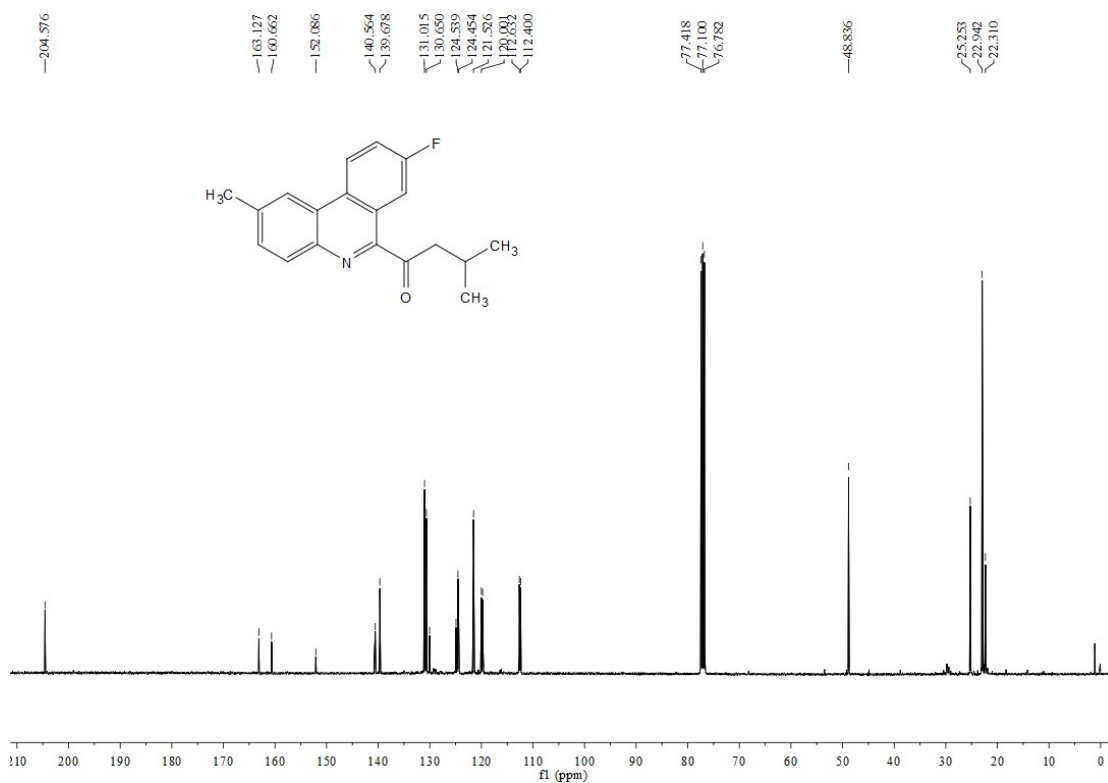

# 1-(benzo[c][2,7]naphthyridin-5-yl)ethan-1-one (3x)

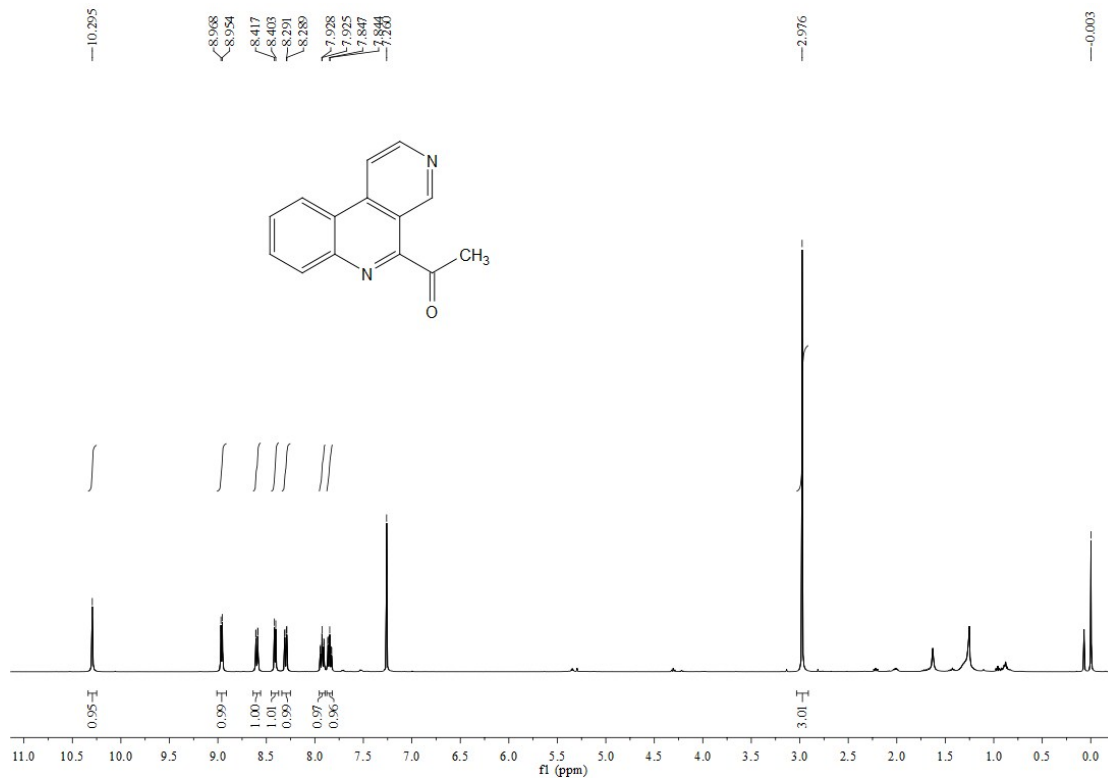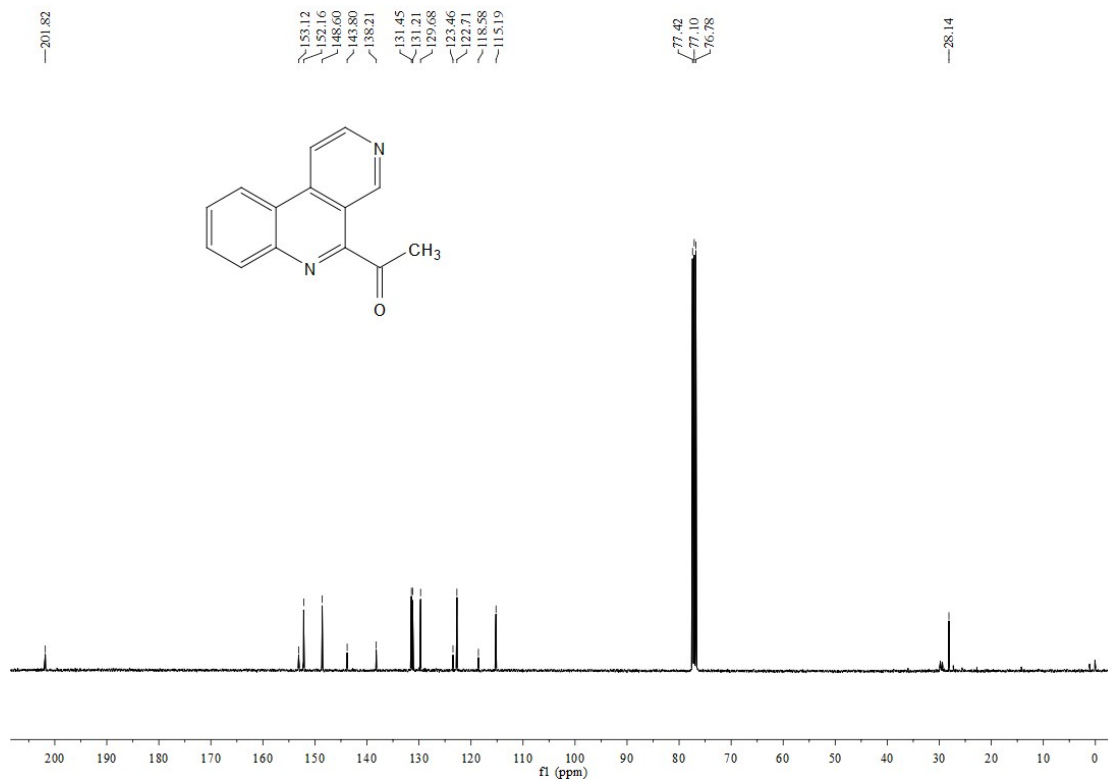



# 1,3,5-trimethyl-3-neopentylindolin-2-one (3y)

20170504 LC-27.1.fid  
Bruker AVANCEIII 400 20170504  
PROTON2 CDCl3 D:\DATA-2017 21

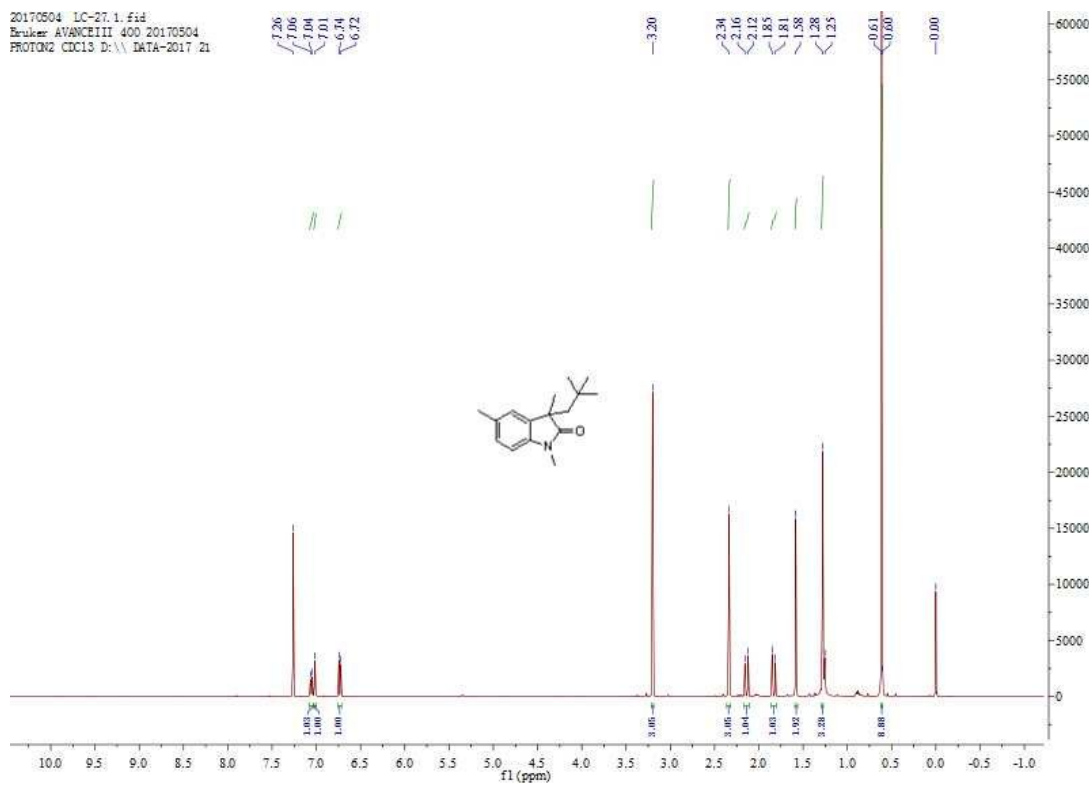

20170504 LC-27.2.fid  
Bruker AVANCEIII 400 20170504  
C13 CDCl3 D:\DATA-2017 21

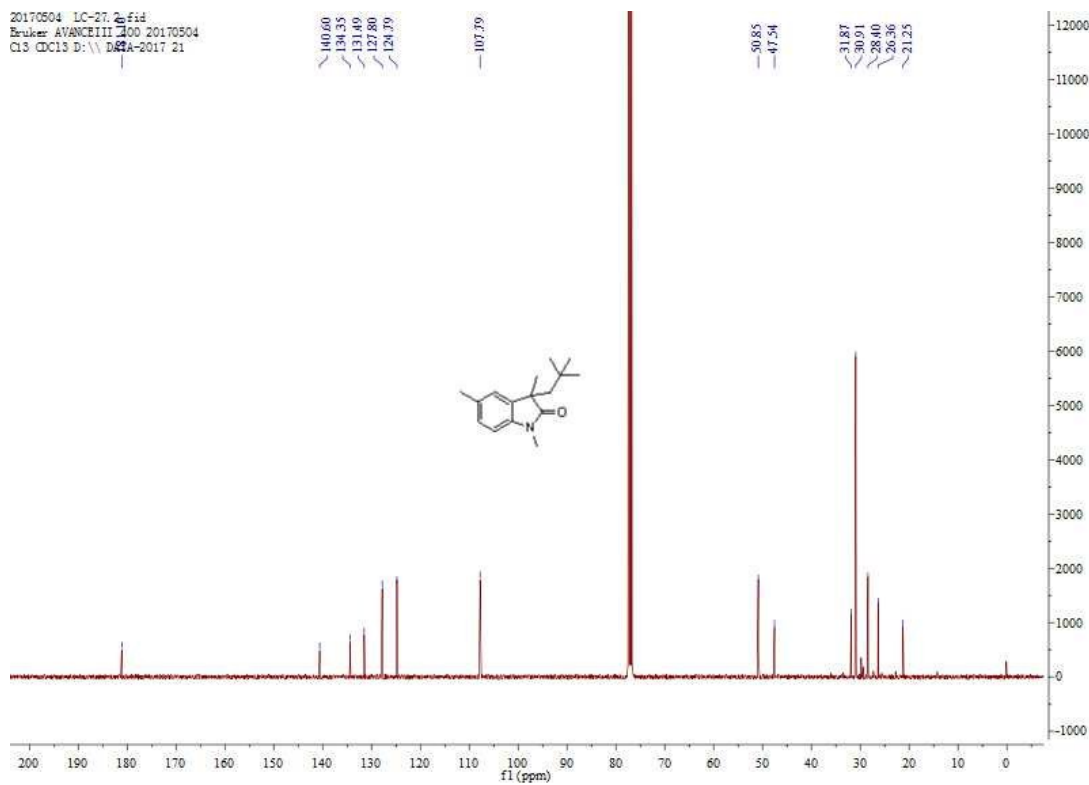

Supplement: c7ra12318c1.pdf [file c7ra12318c1.pdf]
